# Supplementary material for: Evaluation of the boundary layer dynamics of the TM5 model
Source: Copernicus journal article supplement (doi:10.5194/gmd-2016-48), 2016-03-30
Supplement: Supplementary file [file TM5Evaluation_article_Supl_26July2016.pdf › TM5Evaluation_article_Supl_26July2016.pdf]

# Evaluation of the boundary layer dynamics of the TM5 model over Europe

E. N. Koffi<sup>1</sup>, P. Bergamaschi<sup>1</sup>, U. Karstens<sup>2,3</sup>, M. Krol<sup>4,5,6</sup>, A. Segers<sup>7</sup>, M. Schmidt<sup>8,11</sup>, I. Levin<sup>8</sup>, A. T. Vermeulen<sup>9,3</sup>, R. E. Fisher<sup>10</sup>, V. Kazan<sup>11</sup>, H. Klein Baltink<sup>12</sup>, D. Lowry<sup>10</sup>, G. Manca<sup>1</sup>, H. A. J. Meijer<sup>13</sup>, J. Moncrieff<sup>14</sup>, S. Pal<sup>15</sup>, M. Ramonet<sup>11</sup>, H.A. Scheeren<sup>1,13</sup>, A. G. Williams<sup>16</sup>

1 European Commission Joint Research Centre, Institute for Environment and Sustainability, Ispra (Va), Italy

2 Max-Planck-Institute for Biogeochemistry, Jena, Germany

3 ICOS Carbon Portal, ICOS ERIC at Lund University, Sweden

4 SRON Netherlands Institute for Space Research, Utrecht, Netherlands,

5 Institute for Marine and Atmospheric Research Utrecht, Utrecht, University, Utrecht, Netherlands

6 MAQ, Wageningen University and Research Centre, Wageningen, Netherlands,

7 Netherlands Organisation for Applied Scientific Research (TNO), Utrecht, Netherlands

8 Institut für Umweltphysik, Heidelberg University, Germany

9 Energy research Center Netherlands (ECN), Petten, Netherlands

10 Royal Holloway, University of London (RHUL), Egham, UK

11 Laboratoire des Sciences du Climat et de l'Environnement, LSCE/IPSL, CEA-CNRS-UVSQ, Université Paris-Saclay, F-91191 Gif-sur-Yvette, France

12 Royal Netherlands Meteorological Institute (KNMI), Netherlands

13 Centrum voor Isotopen Onderzoek (CIO), Rijksuniversiteit Groningen, Netherlands

14 Atmospheric Chemistry Research Group, University of Bristol, UK

15 Department of Meteorology, Pennsylvania State University, State College, PA, USA

16 Australian Nuclear Science and Technology Organisation (ANSTO) Environment Research Theme, Locked Bag 2001, Kirrawee DC, NSW 2232, Australia

26 July 2016

Revised version for Geosci. Model Dev.

## Supplementary material

## Comparison of IGRA boundary layer heights to ceilometer observations at Cabauw

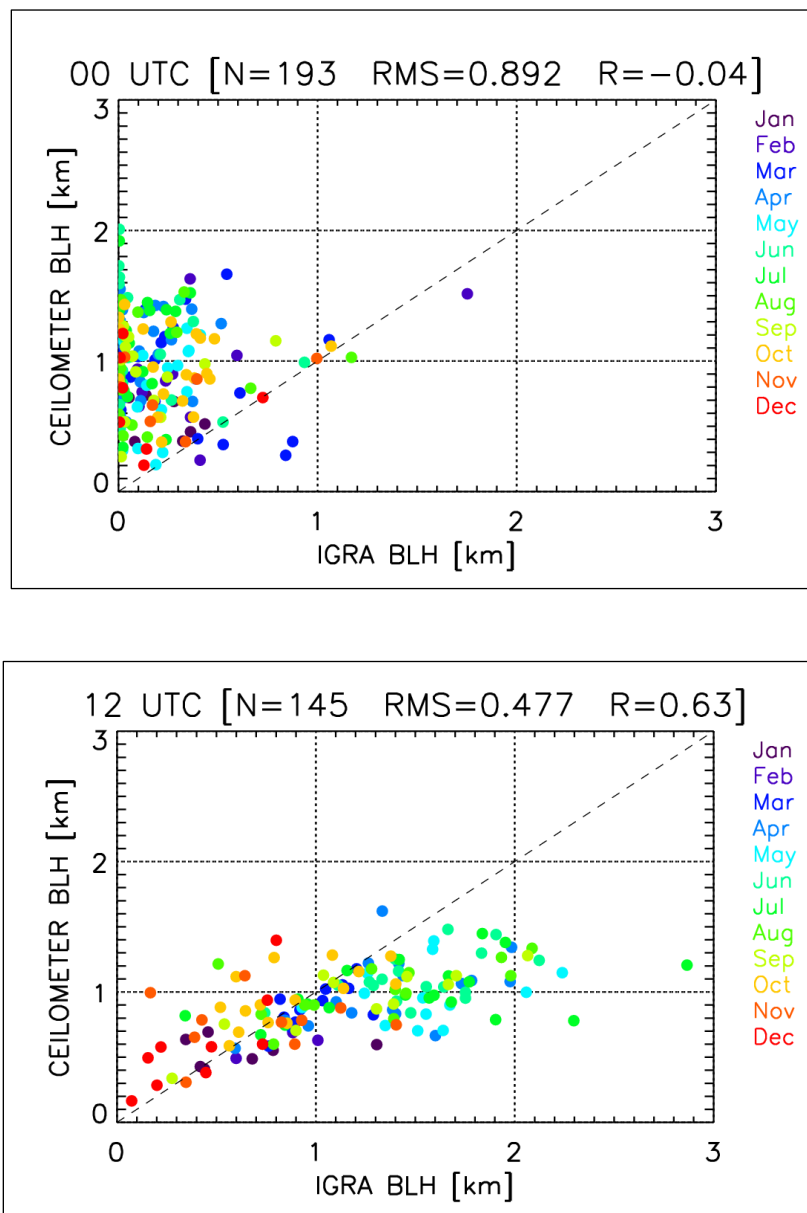

**Figure S1:** The Cabauw ceilometer boundary layer heights versus IGRA (De Bilt station) data for the year 2010 at 00 (on the top) and 12 (bottom) UTC are shown. The statistics (RMS in km and correlation coefficient  $R$ ) are indicated as well as the number of pair of data ( $N$ ) used to compute these metrics. The different colors indicate the months at which the data were obtained

# Comparison of TM5 boundary layer heights to observations

We extract the BLH in the model both at the location of the InGOS station and at the location of the nearest IGRA station, resulting in a set of four different modeled BLHs labelled by the following acronyms:

- 'TM5': TM5 default version (Eq.1 in Section 2.1 with  $R_{ic} = 0.3$ ); extracted at InGOS stations by using 2D interpolation
- 'TM5\_IGRA': As 'TM5', but extracted at IGRA station, which is closest to the selected InGOS station
- 'TM5\_INGOS': BLHs computed in TM5 model adopting the InGOS definition of the BLH (i.e.,  $R_{ic} = 0.25$  and both surface wind and stress velocity are set to zero in Eq.1), extracted at InGOS station. The BLH of the closest model grid point to the selected station is considered.
- 'TM5\_INGOS\_IGRA': As 'TM5\_INGOS', but extracted at IGRA station, which is closest to the selected InGOS station

Furthermore, we evaluate the BLHs as provided by ECMWF analyses and interpolated to TM5 grids (labelled 'ECMWF'). The values of these BLHs are extracted only at the InGOS stations.

For other details see Section 3.2 of the text of the main paper

We show hereafter only the data for the closest IGRA stations to InGOS ones and for year 2009

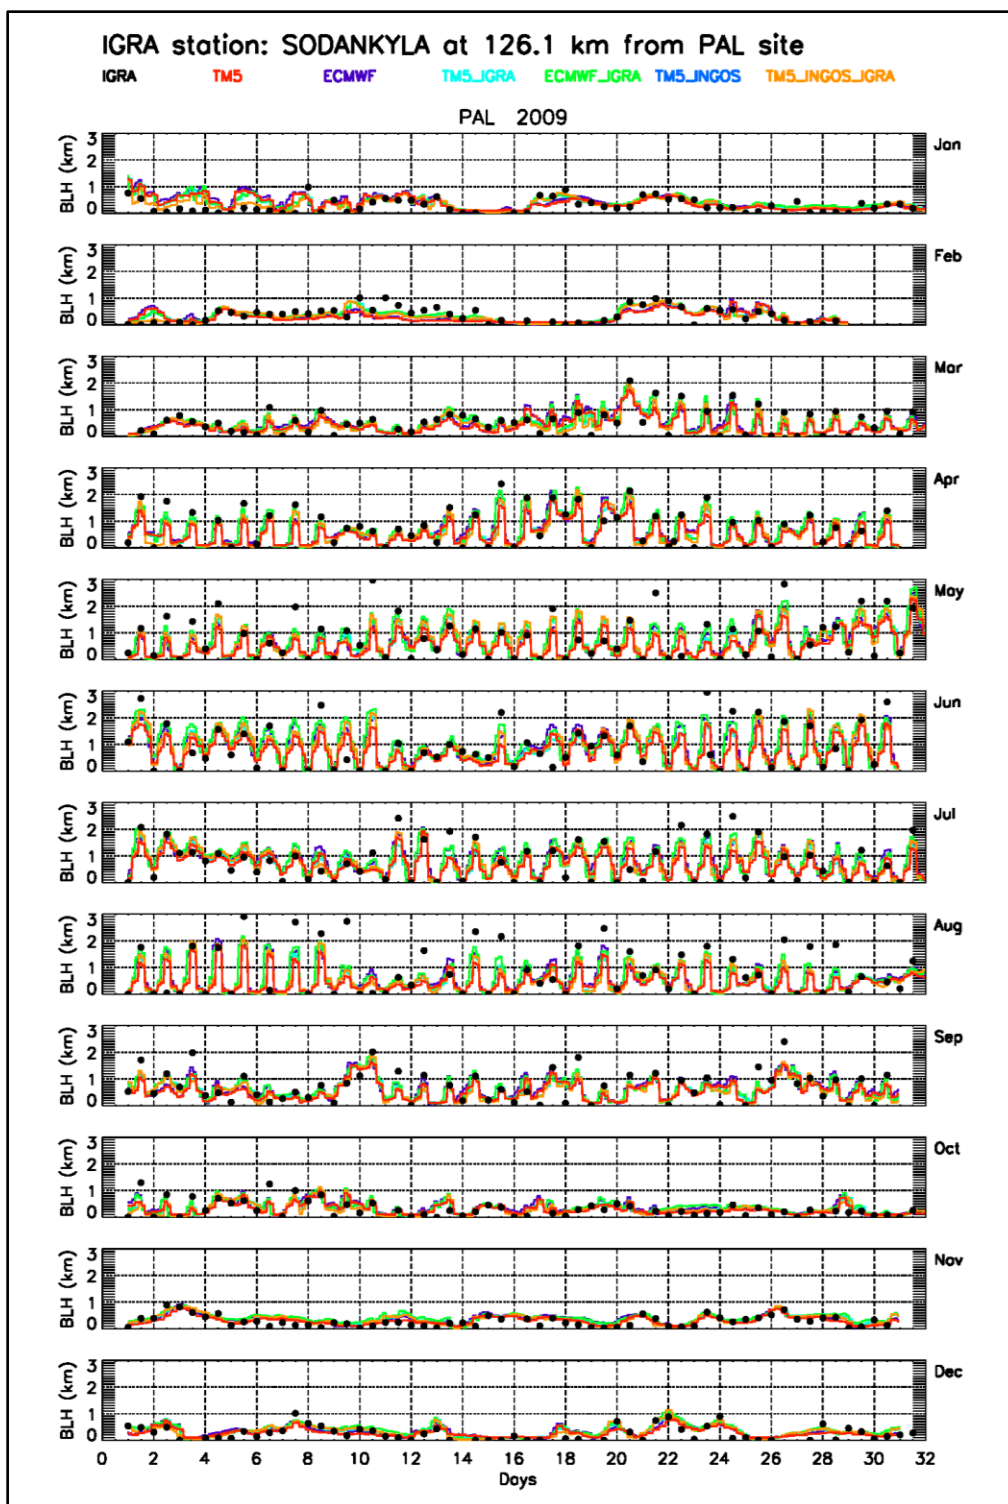

**Figure S2:** Time series of observed (IGRA in black dot) and modelled (TM5, TM5\_IGRA, TM5\_INGOS, and TM5\_INGOS\_IGRA in colors) boundary layer heights relevant for InGOS station Pallas (PAL) are shown. The closest IGRA station to Pallas is Sodankyla. The distance between IGRA and InGOS stations is given of the top of graph. The different model acronyms are defined at page 3 in this document

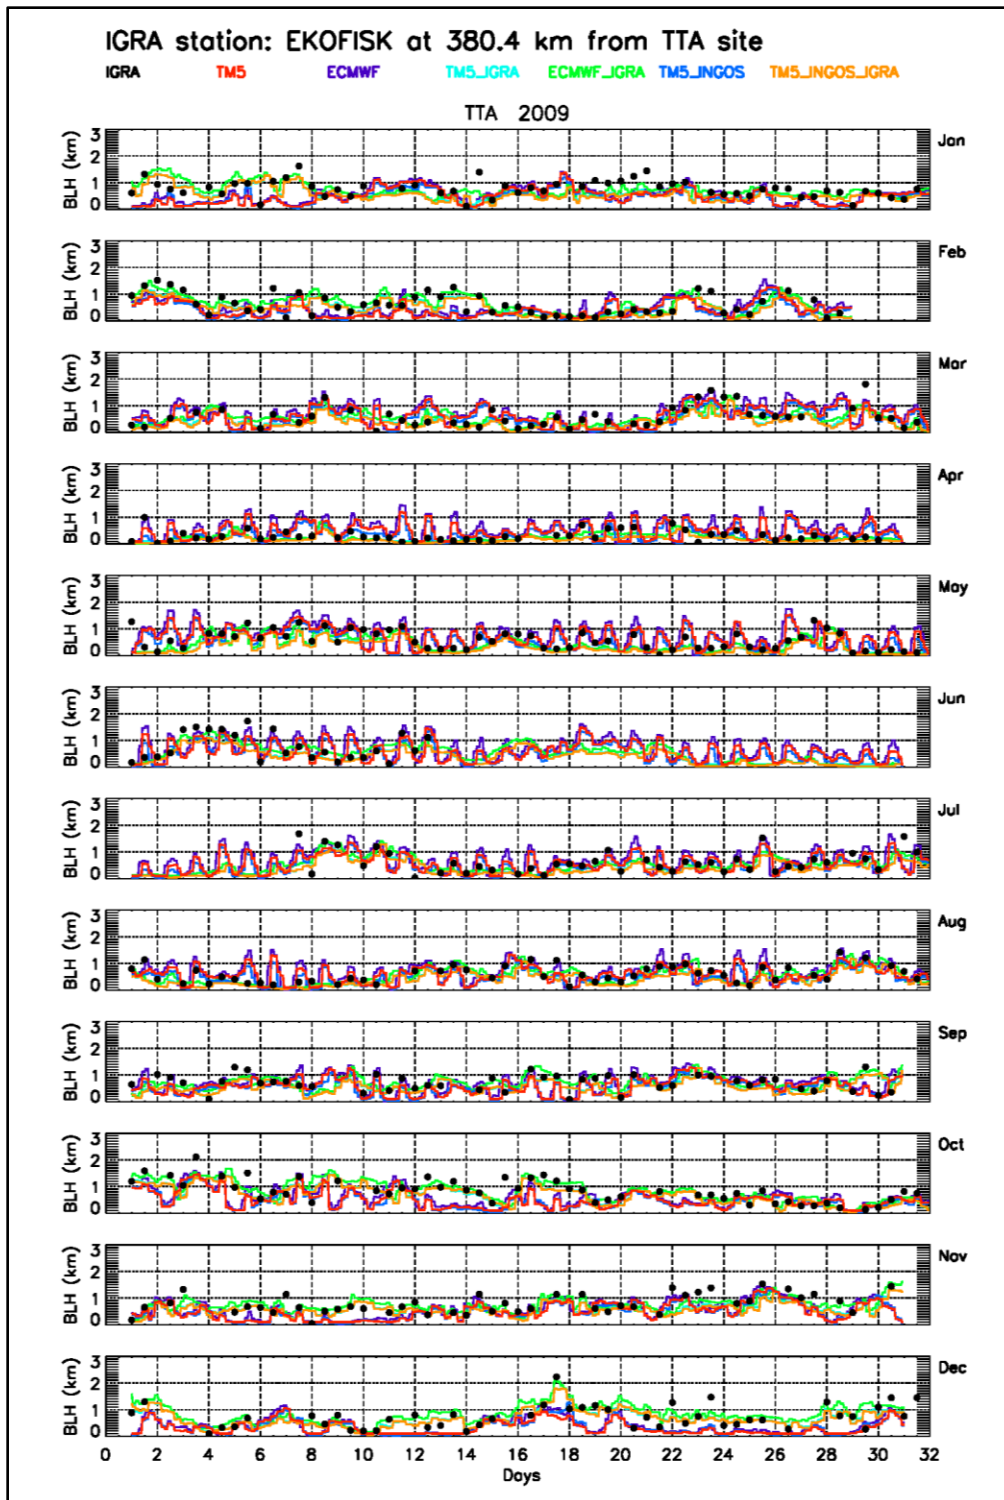

**Figure S3:** As Figure S2, but for the InGOS station Angus (TTA)

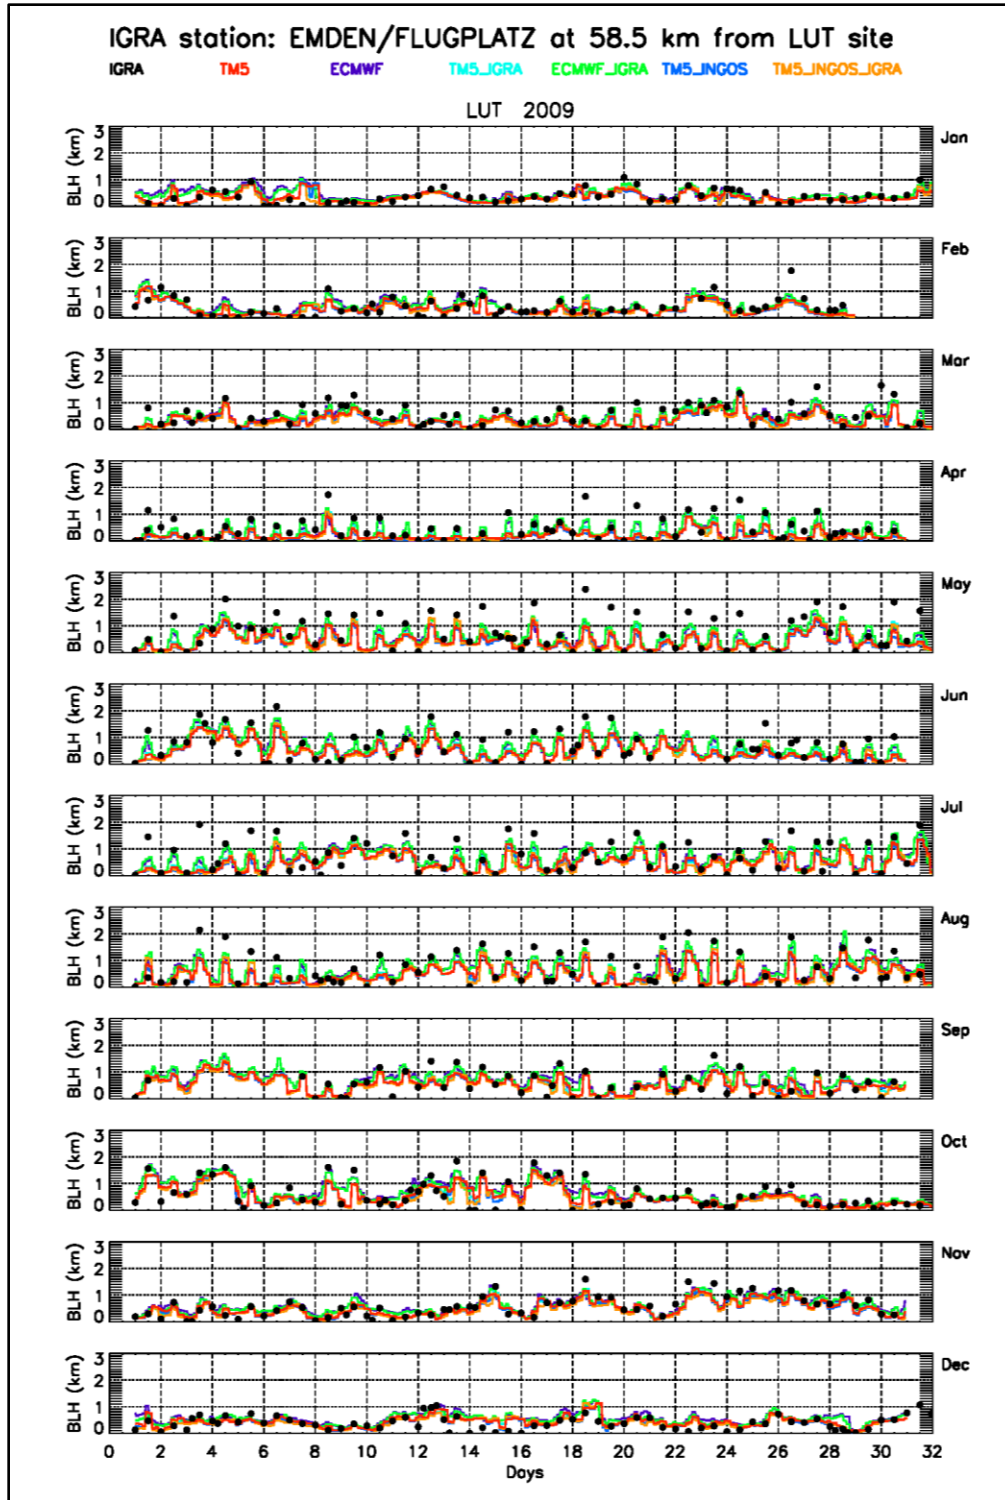

**Figure S4:** As Figure S2, but of the InGOS station Lutjewad (LUT)

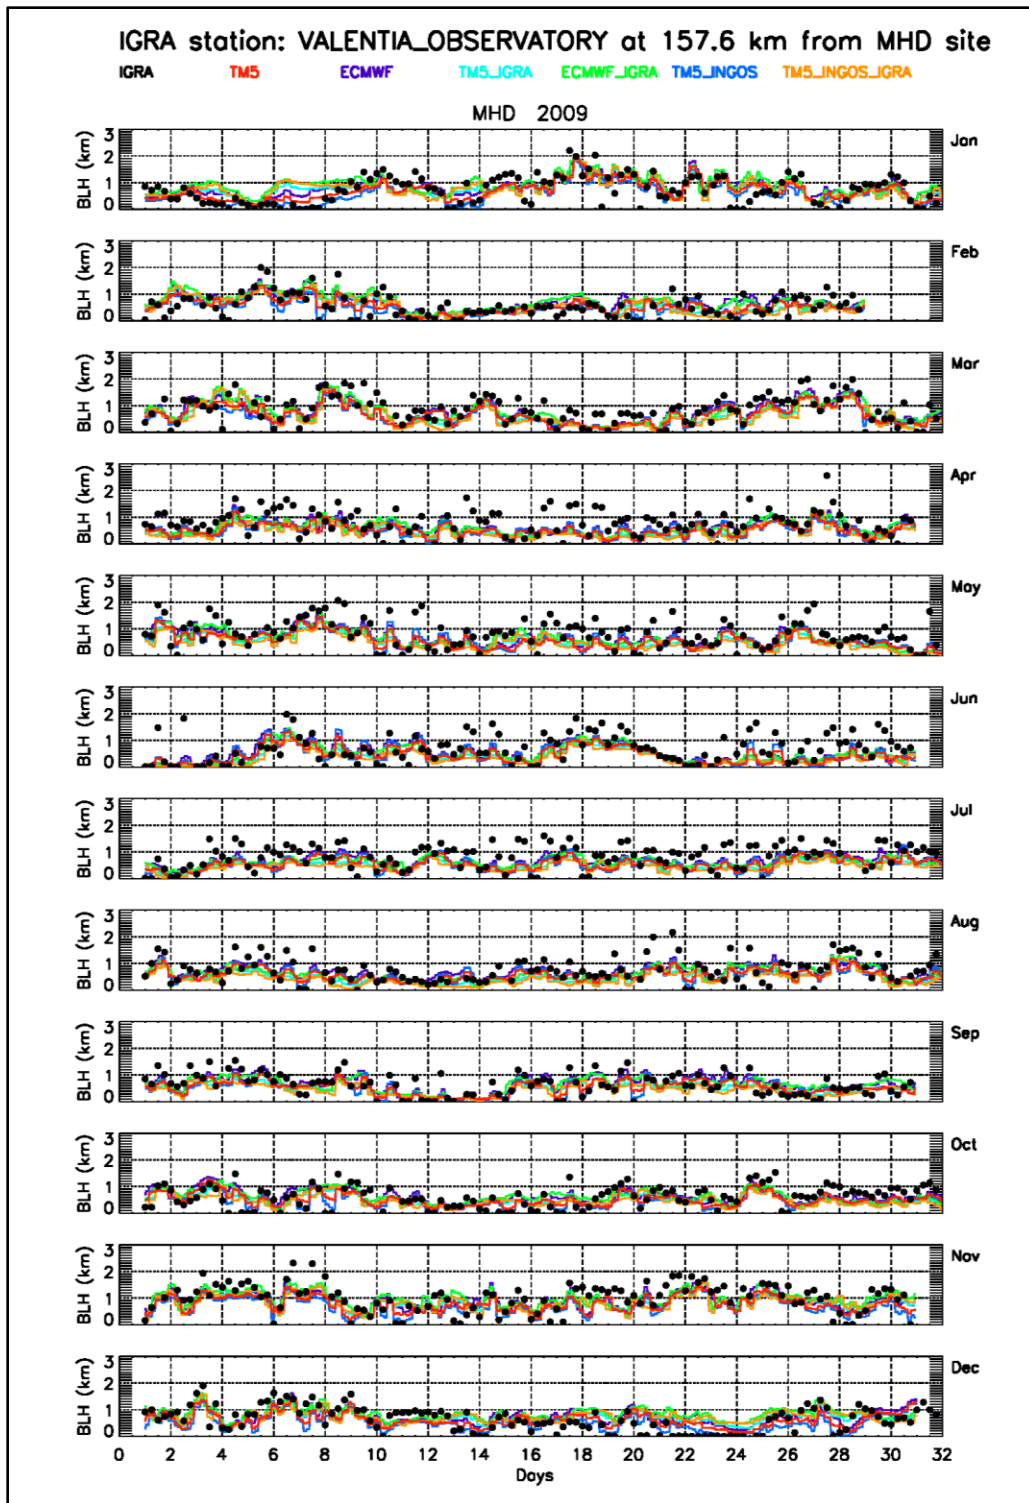

**Figure S5:** As Figure S2, but for the InGOS station Mace Head (MHD)

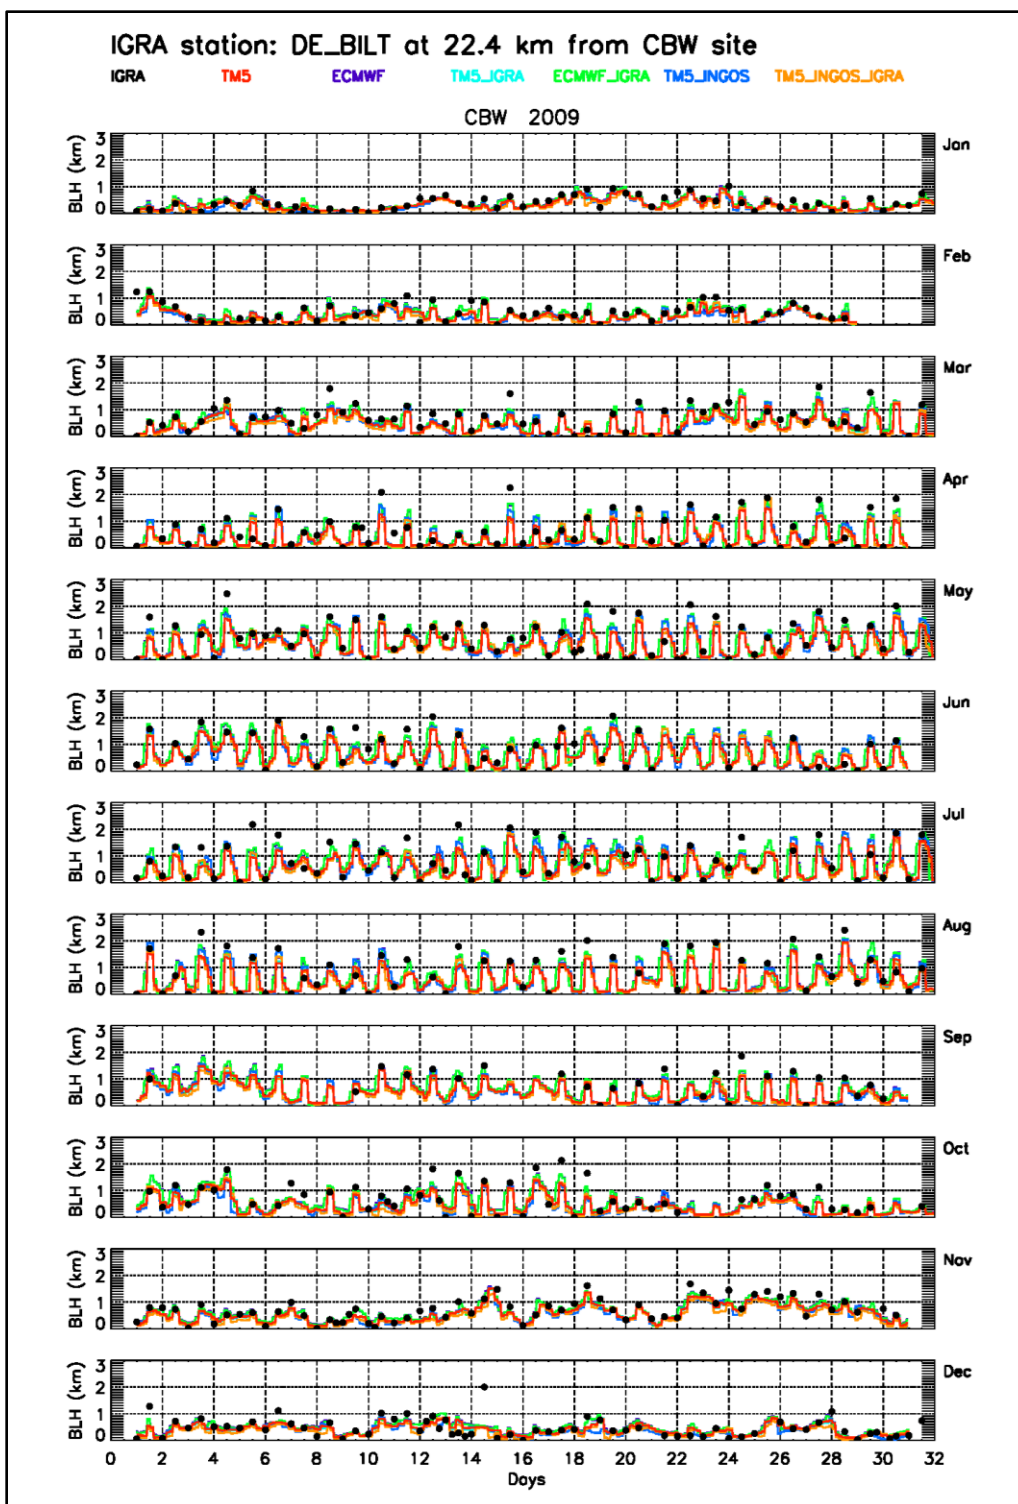

**Figure S6:** As Figure S2, but for the InGOS station Cabauw (CBW or CB1/CB4)

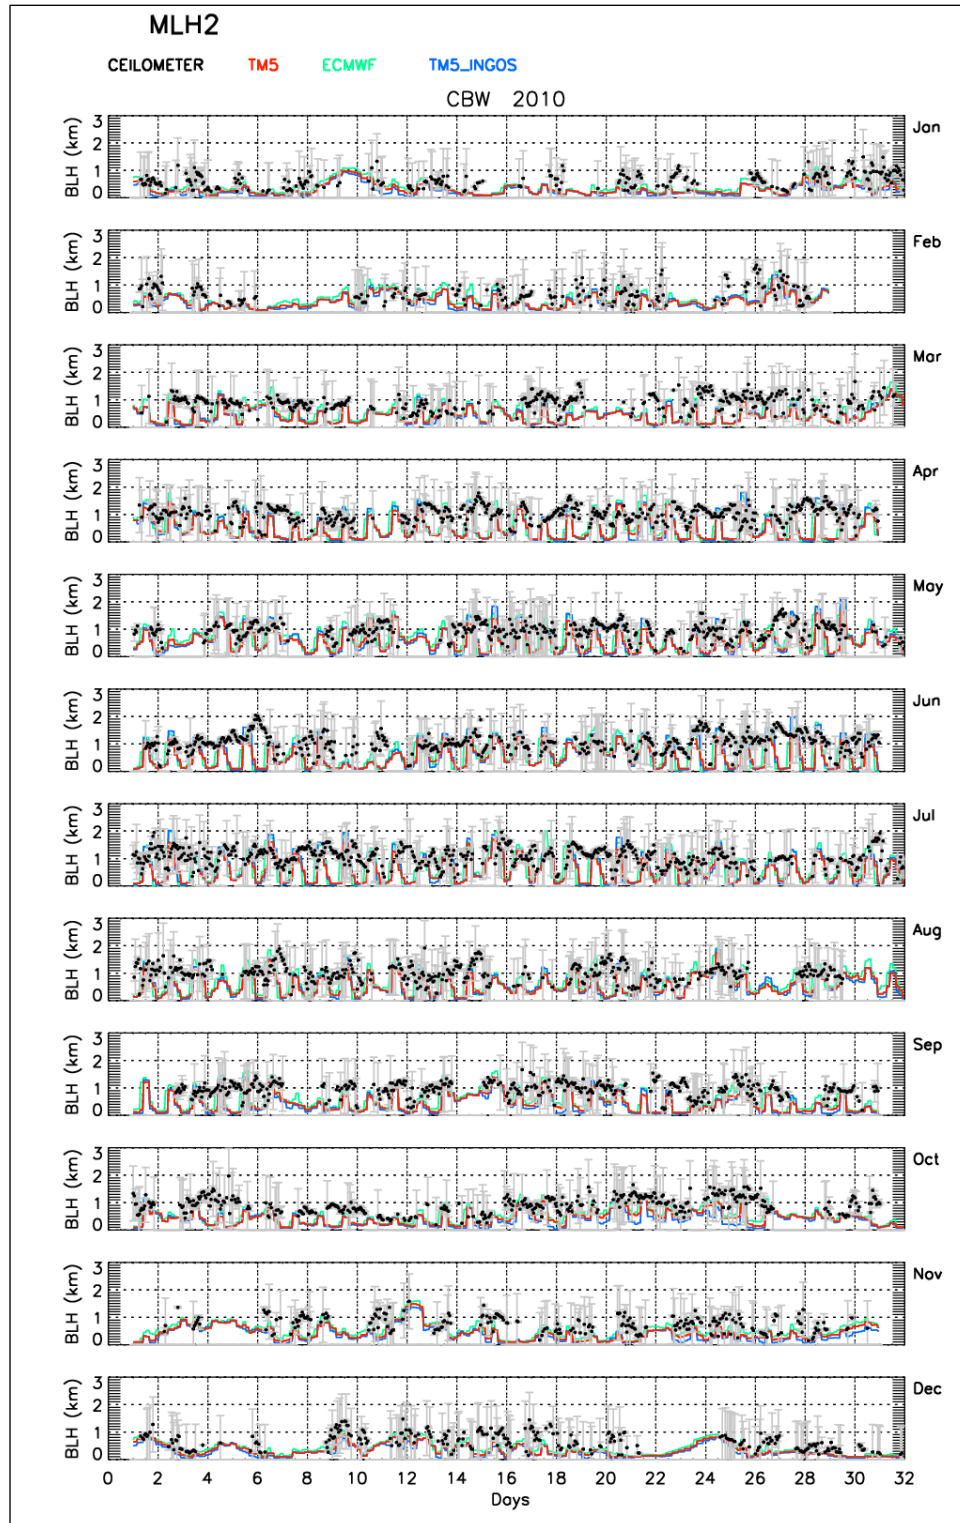

**Figure S6b:** As for Figure S6, but the observations for the year 2010 are from the ceilometer measurements at Cabauw (CBW). The standard deviations over 1h period are shown in grey

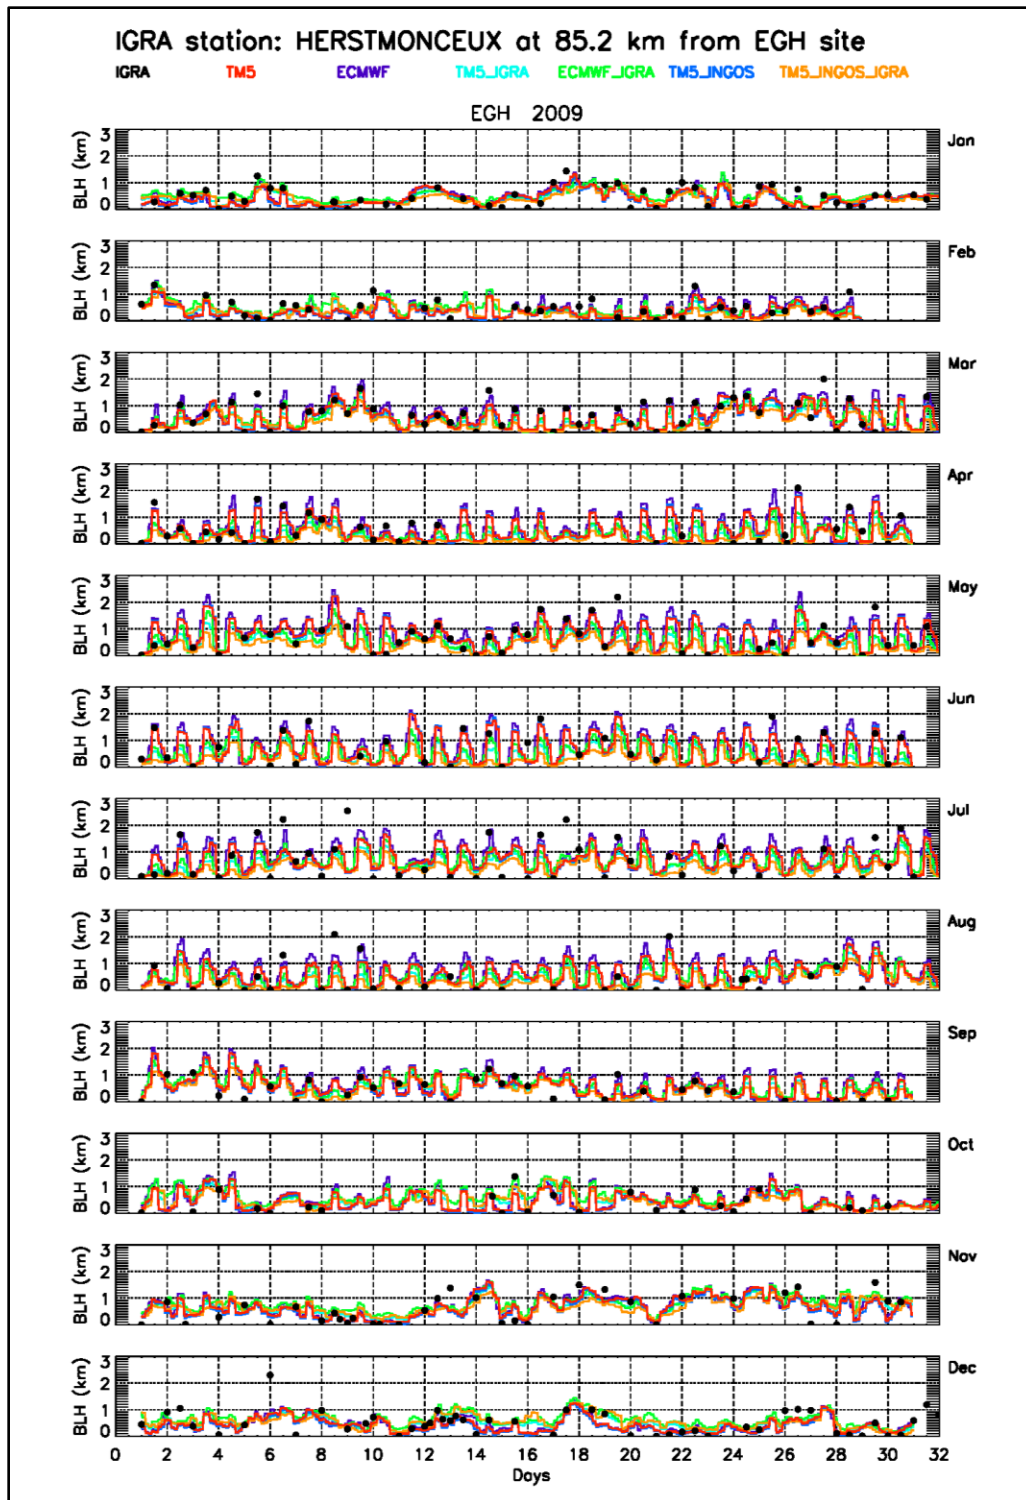

**Figure S7:** As Figure S2, but for InGOS station Egham (EGH)

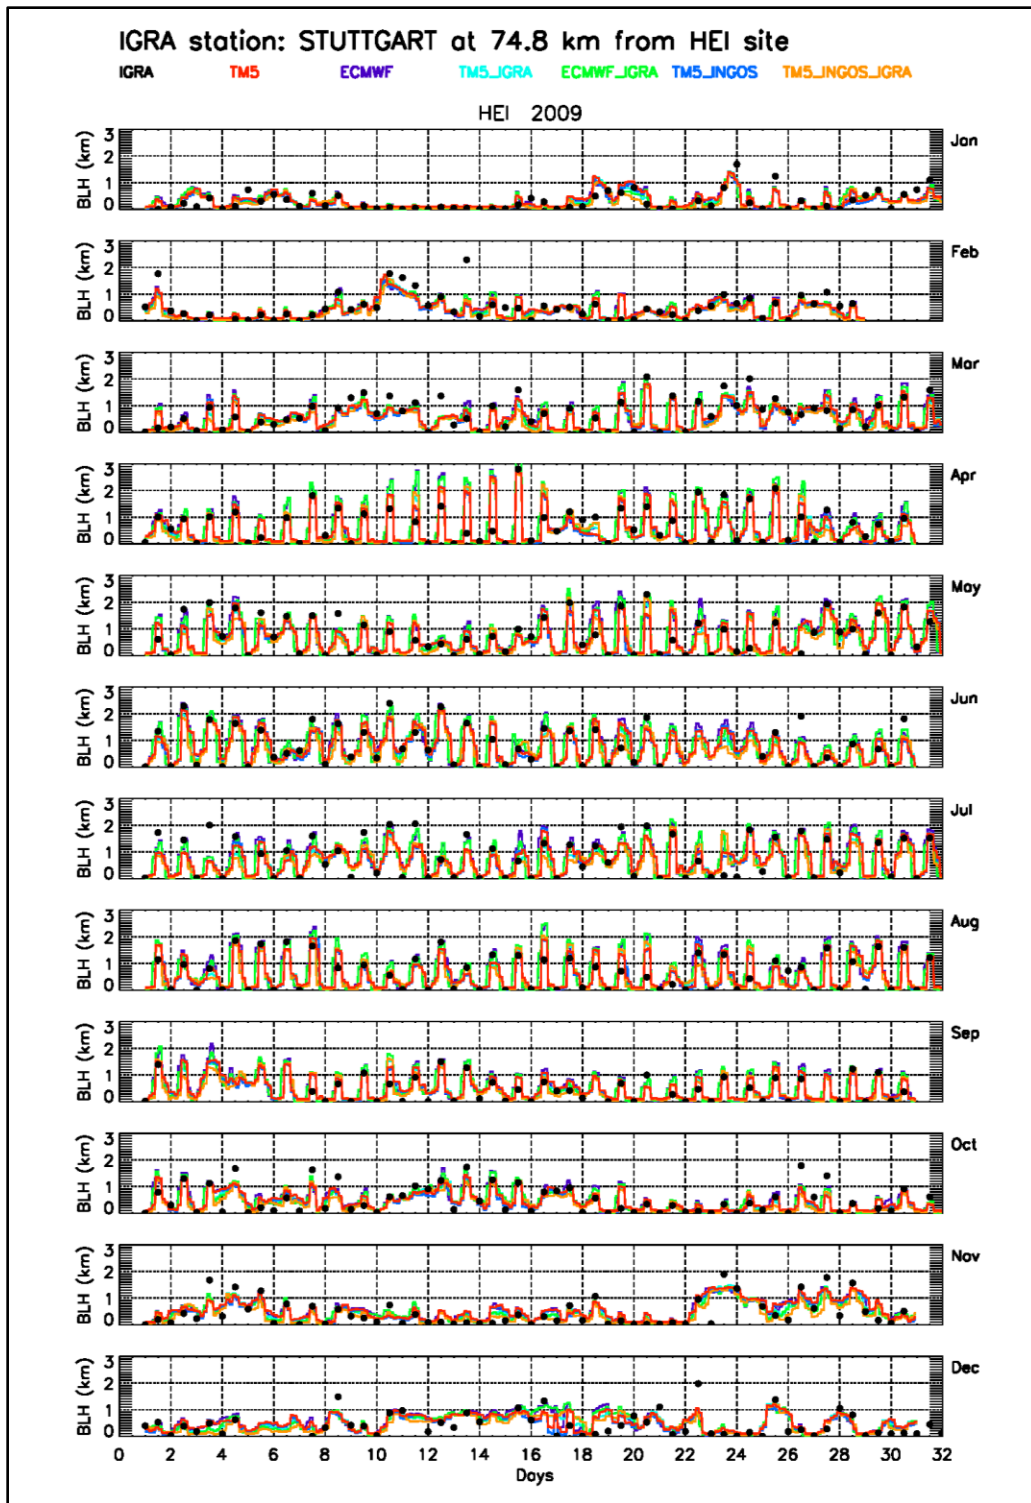

**Figure S8:** As Figure S2, but for InGOS station Heidelberg (HEI)

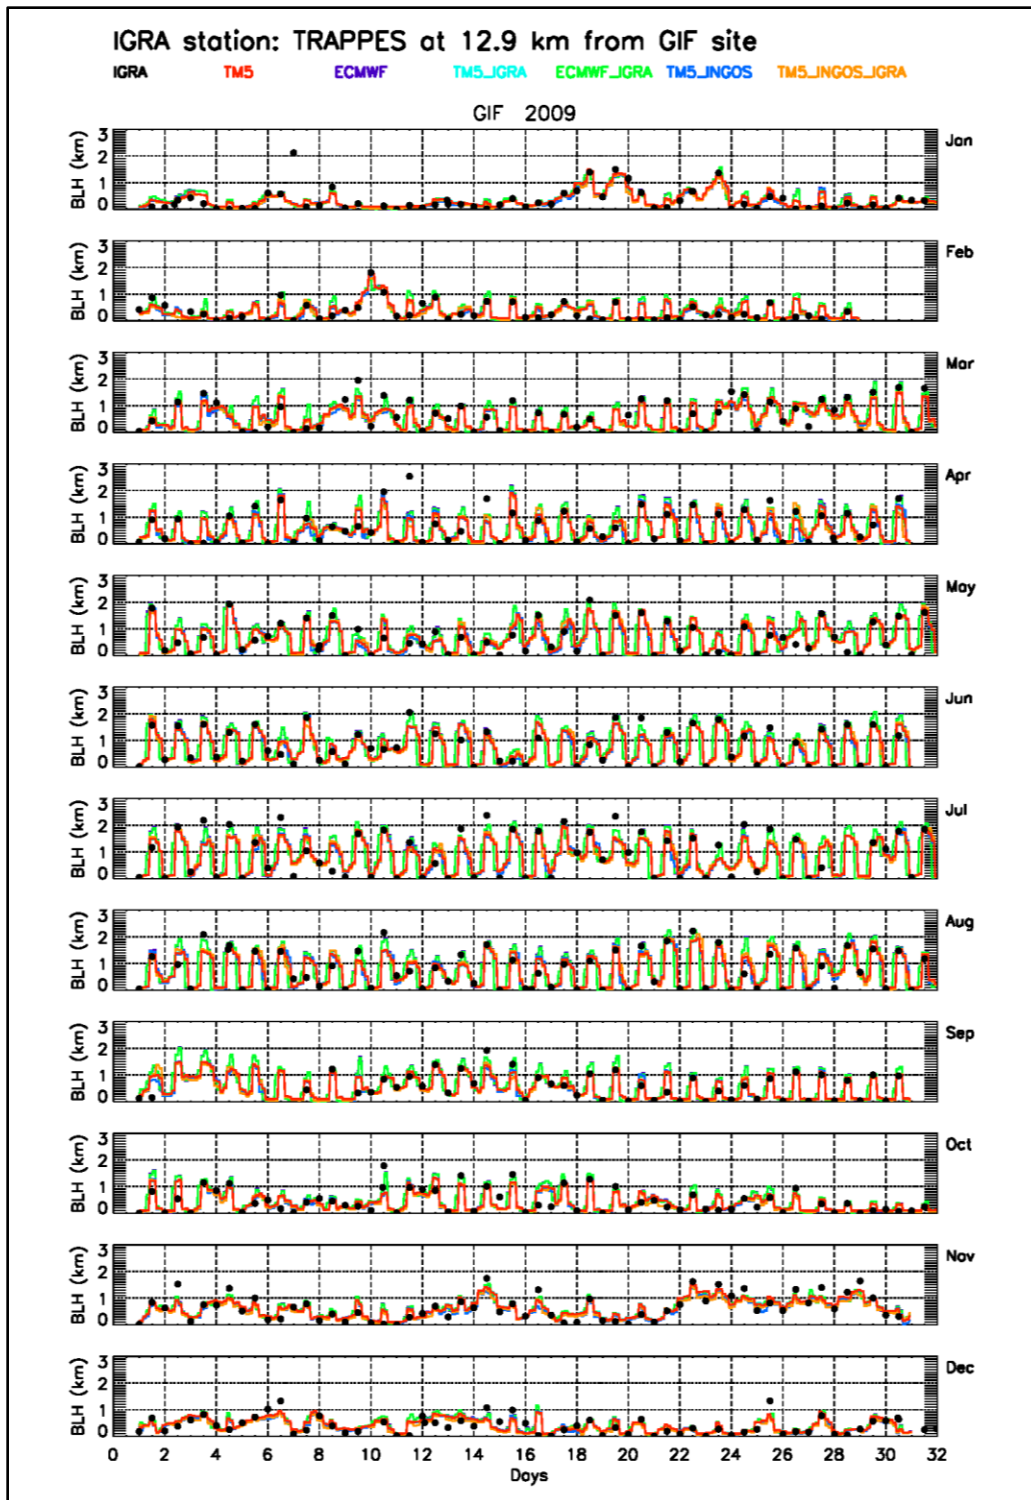

**Figure S9:** As Figure S2, but for InGOS station Gif sur Yvette (GIF)

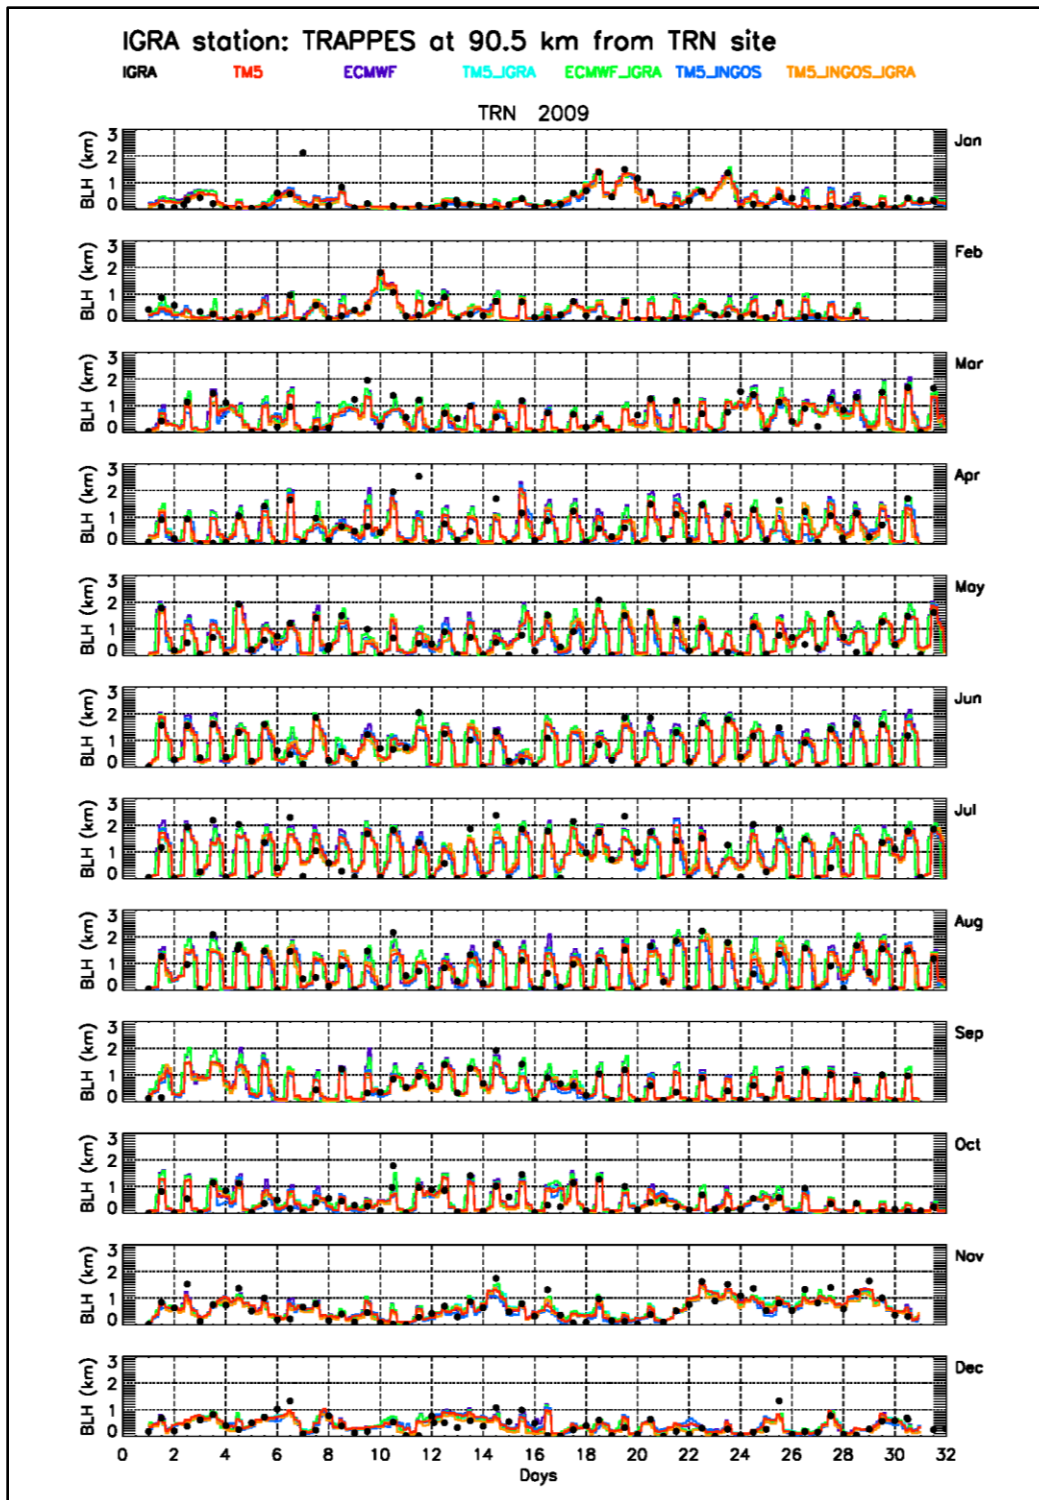

**Figure S10:** As Figure S2, but for the InGOS station Trainou (TRN or TR4)

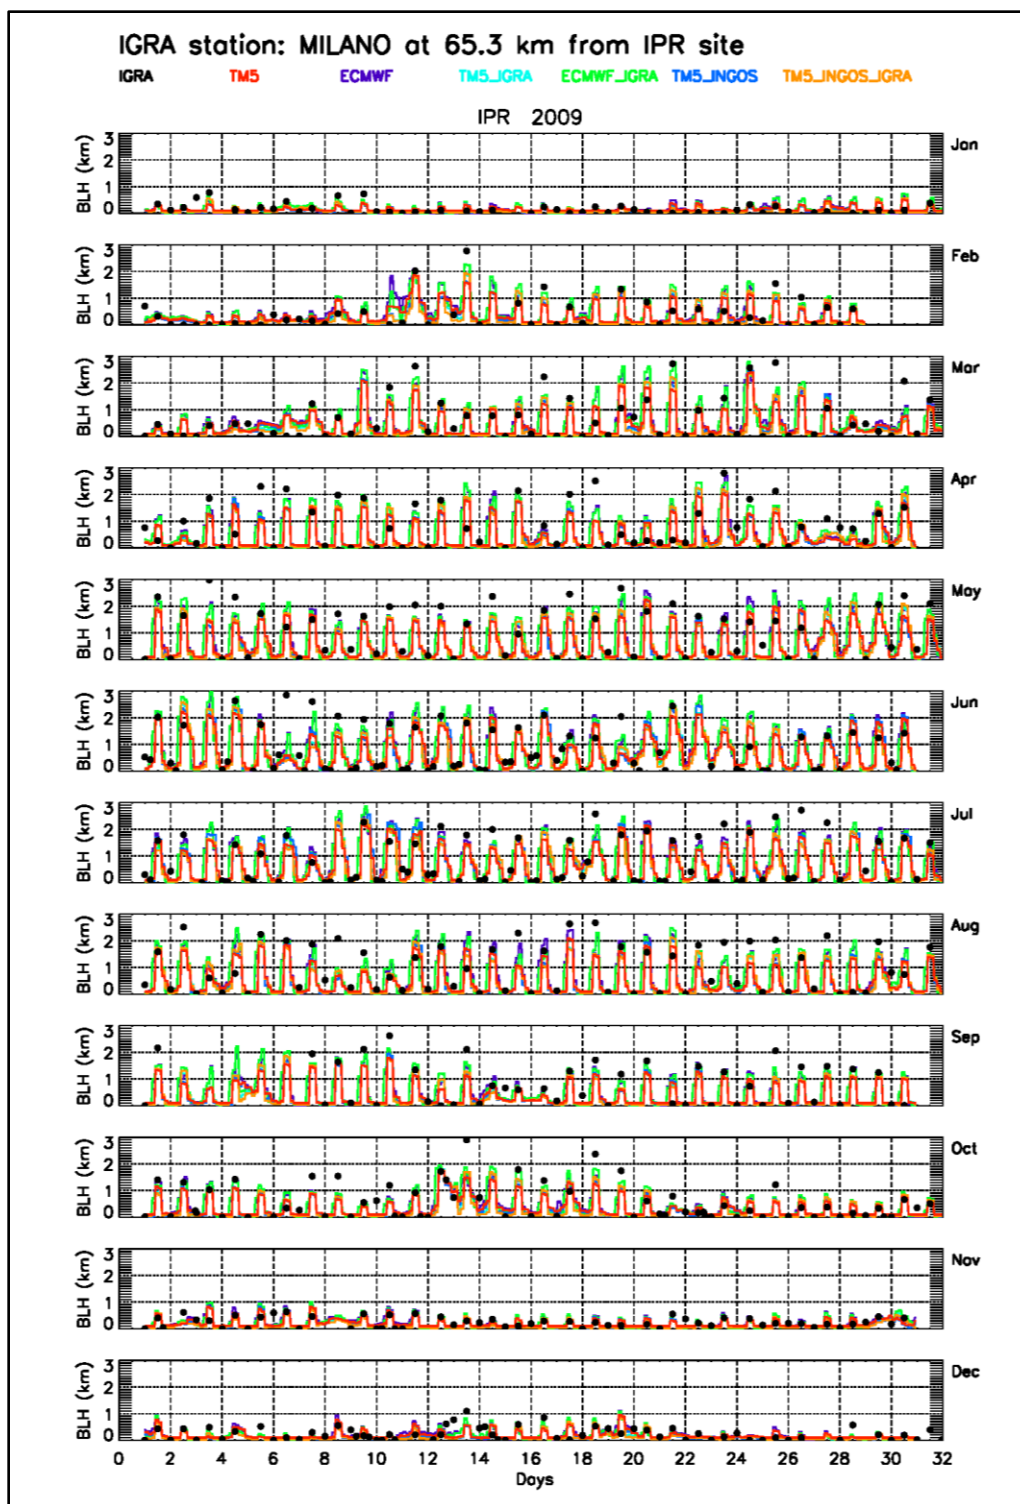

**Figure S11:** As Figure S2, but for the InGOS station Ispra (IPR)

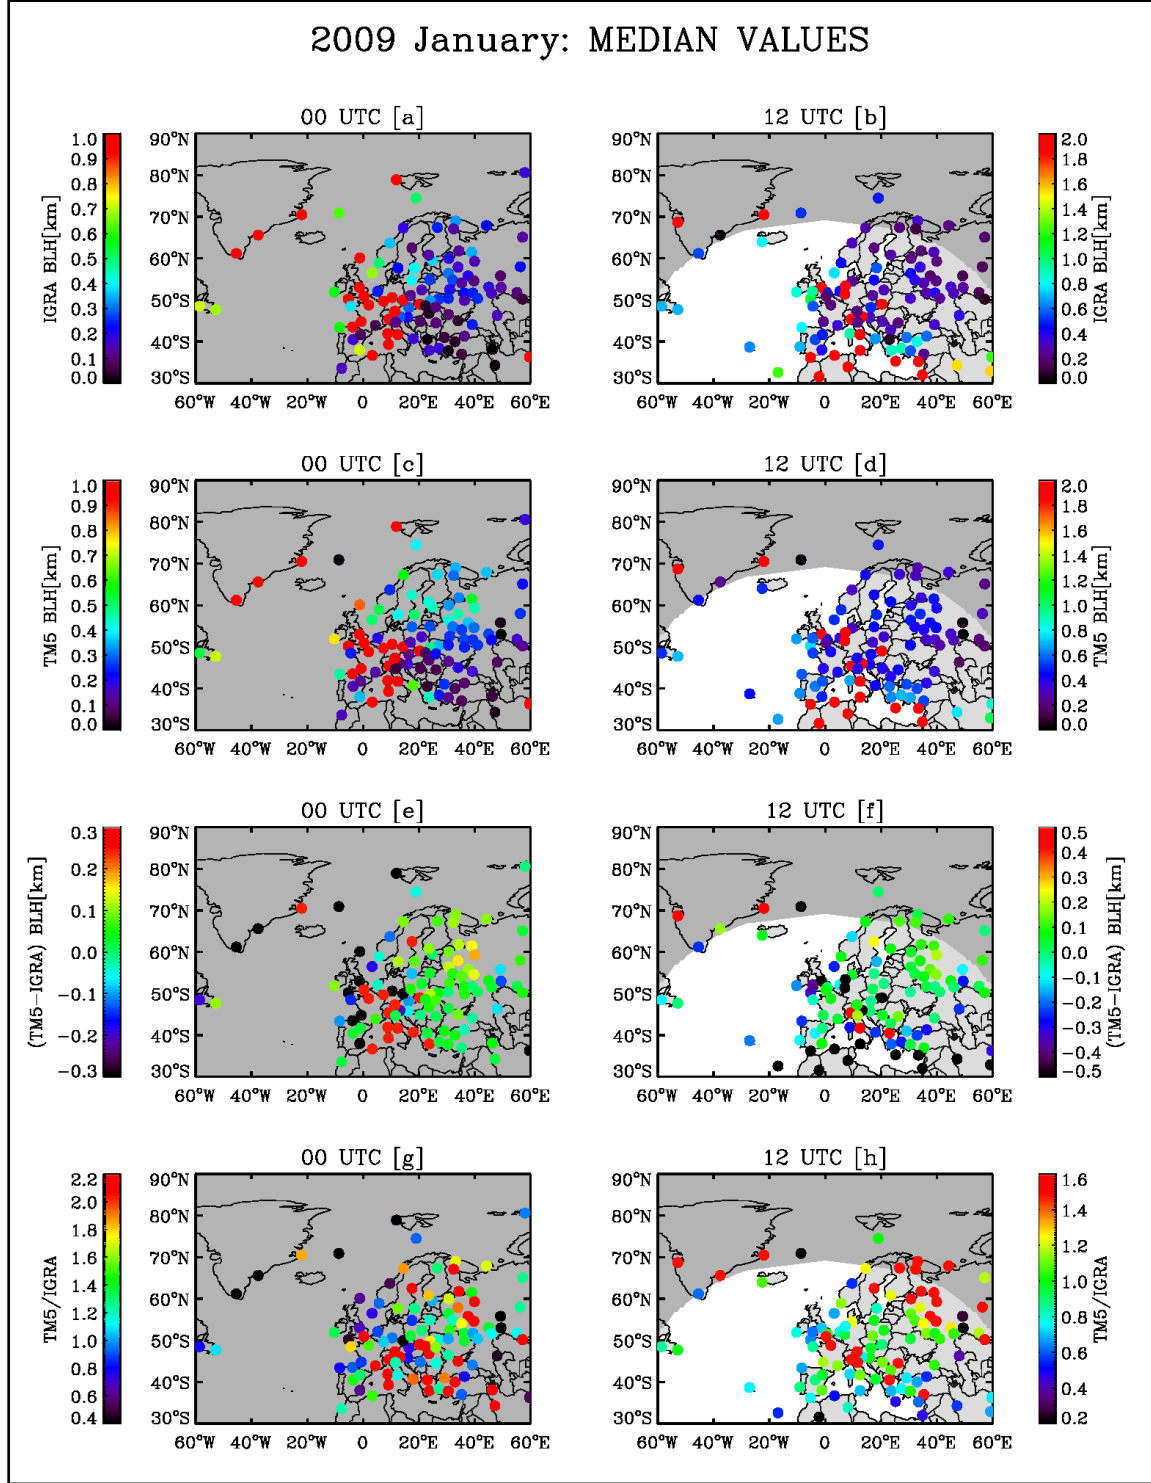

**Figure S12:** Median values of IGRA and TM5 boundary layer heights [a, b, c, and d] together with their differences (TM5-IGRA) [e and f] for January 2009 are shown. The median values of the ratios between TM5 and IGRA boundary layer heights (TM5/IGRA) [g and h] are also displayed. Left: 00UTC; right: 12 UTC.

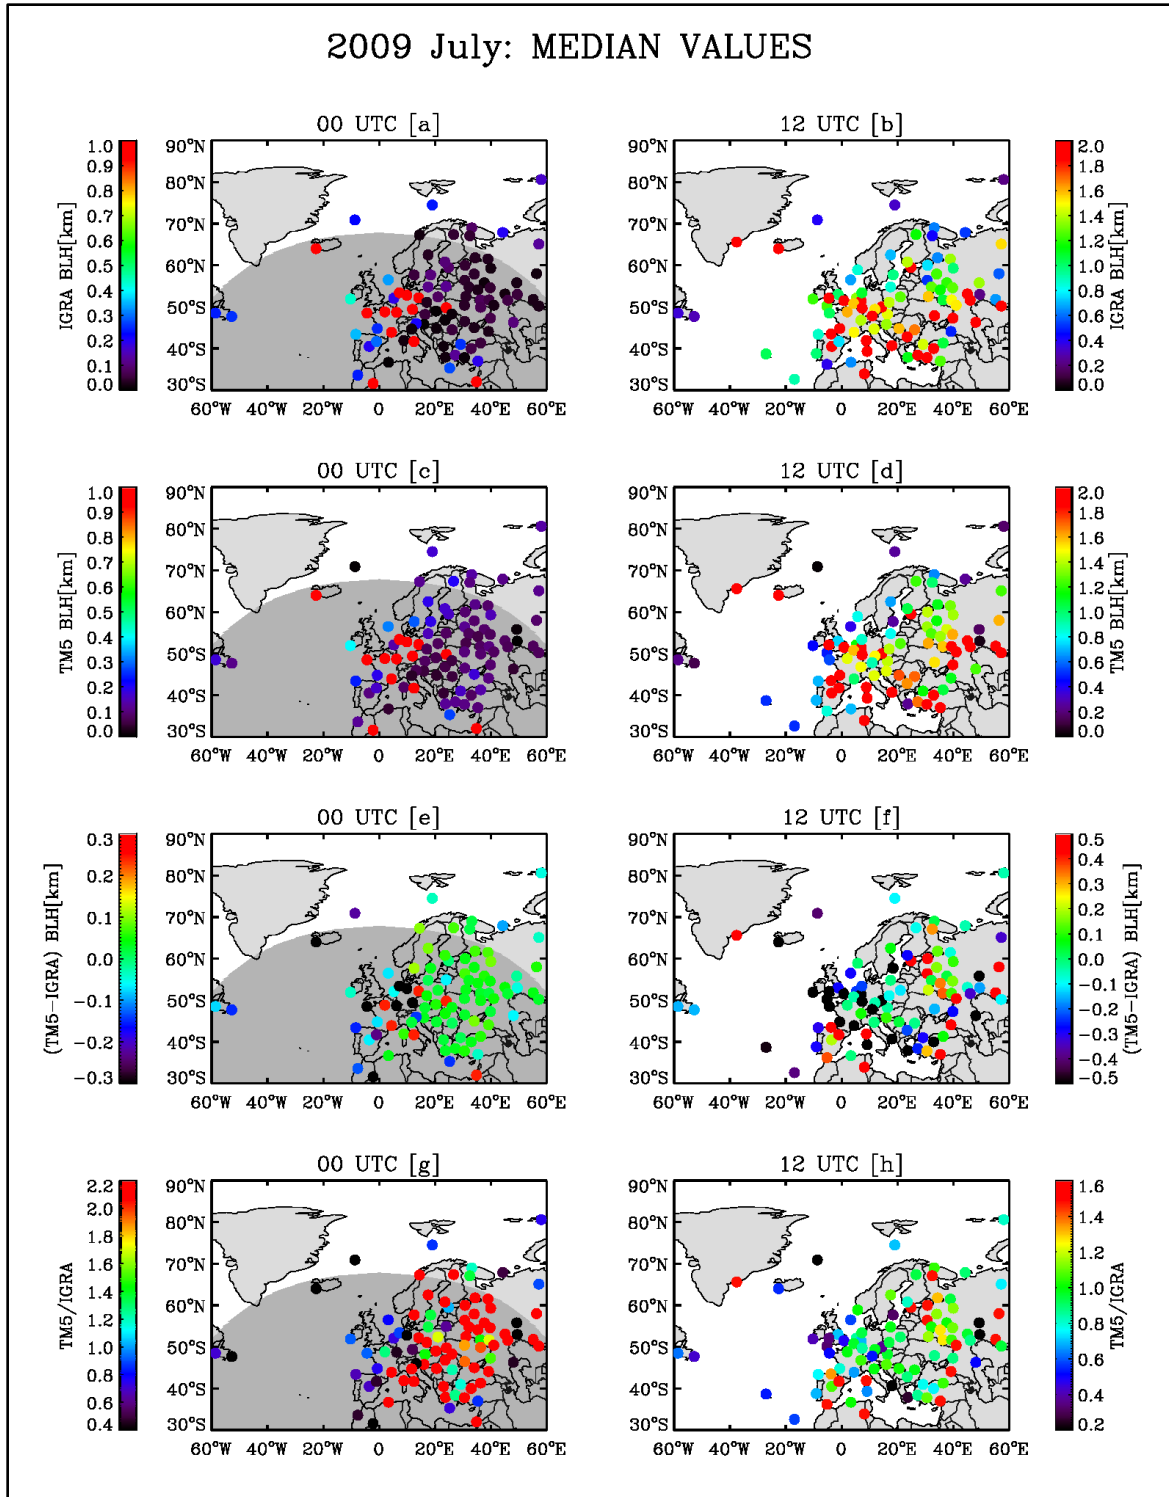

**Figure S13:** As for Figure S12, but for July 2009

## Time series of $^{222}\text{Rn}$ activity concentrations

We simulate  $^{222}\text{Rn}$  concentrations using either the InGOS  $^{222}\text{Rn}$  flux map, or constant  $^{222}\text{Rn}$  fluxes (see Section 3.3). Furthermore, we apply four different convection schemes in the TM5 model (for the InGOS  $^{222}\text{Rn}$  flux map based simulations only). These different simulations are labelled by the following acronyms:

- FC\_CT: constant  $^{222}\text{Rn}$  fluxes, and default convection scheme in TM5 based on *Tiedtke* [1989]
- FI\_CT: InGOS  $^{222}\text{Rn}$  flux map, and default convection
- FI\_CS: InGOS  $^{222}\text{Rn}$  flux map and revised slopes scheme (see Section 3.1 of the text)
- FI\_CE: InGOS  $^{222}\text{Rn}$  flux map and the updated convection scheme based on ECMWF reanalyses (see Section 3.1 of the text)
- FI\_CU: InGOS  $^{222}\text{Rn}$  flux map, updated treatment of slopes and updated convection scheme based on ECMWF

For other details see Section 3.4 of the text

We show hereafter only the data for year 2009

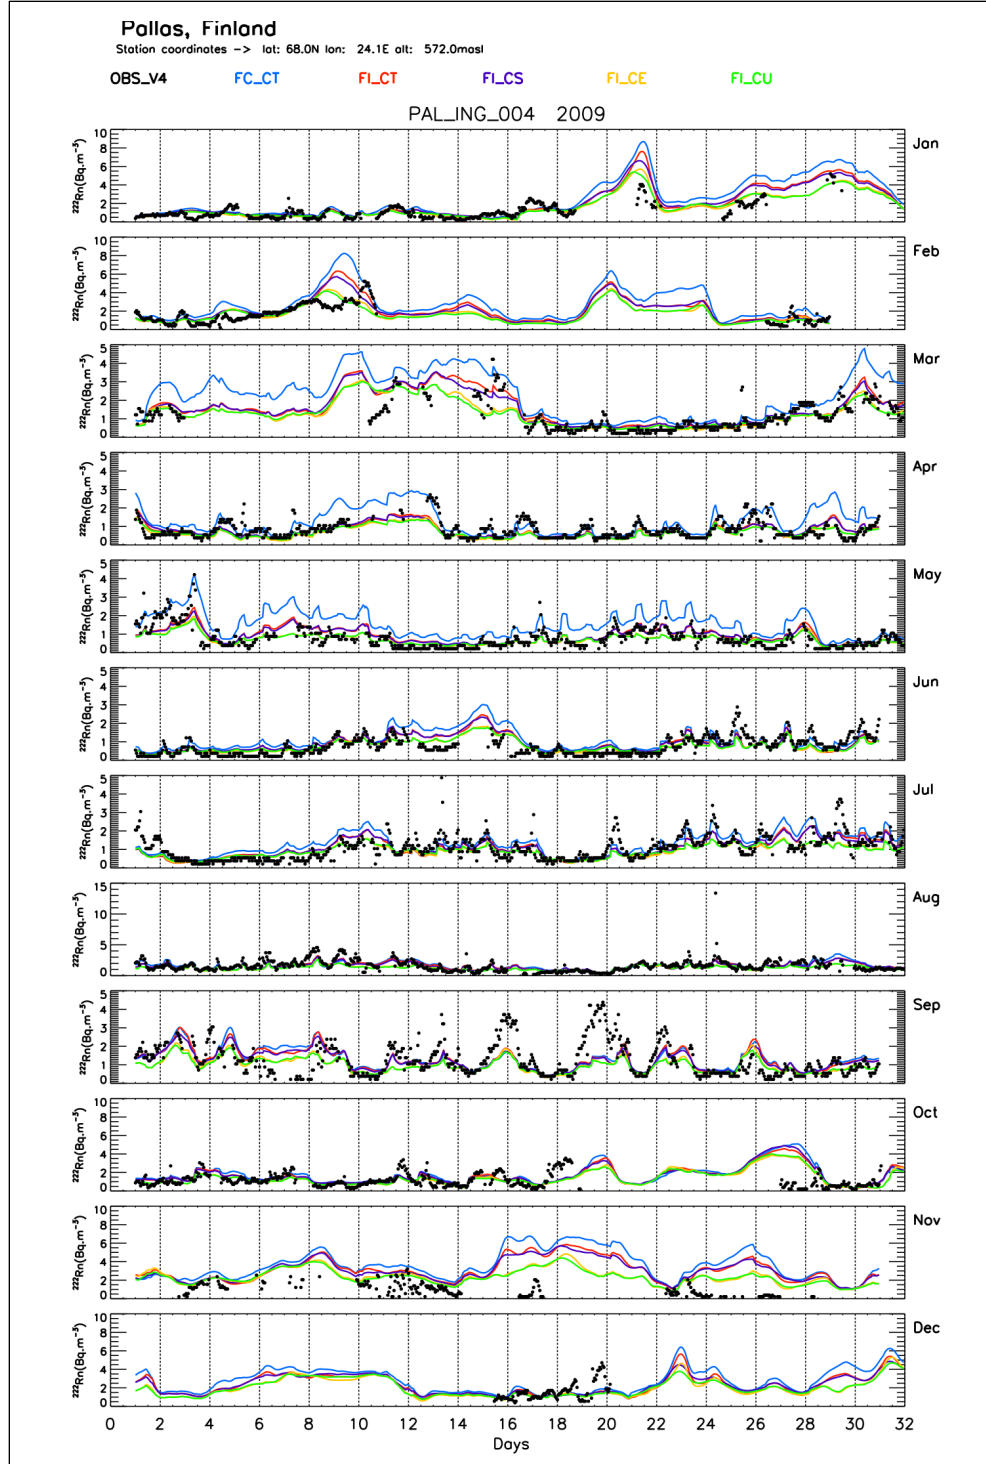

**Figure S14:** The time series of the observed and simulated radon activity concentrations at Palas [PAL] for 2009. The observed radon concentrations are in big dots (●). The model simulations are obtained from constant emissions (solid blue line; FC\_CT) and four from INGOS emissions (solid red line: FI\_CT, solid violet line: FI\_CS, solid orange line: FI\_CE, and solid green line: FI\_CU). The different acronyms are defined in the previous page or in Section 3.4 of the text

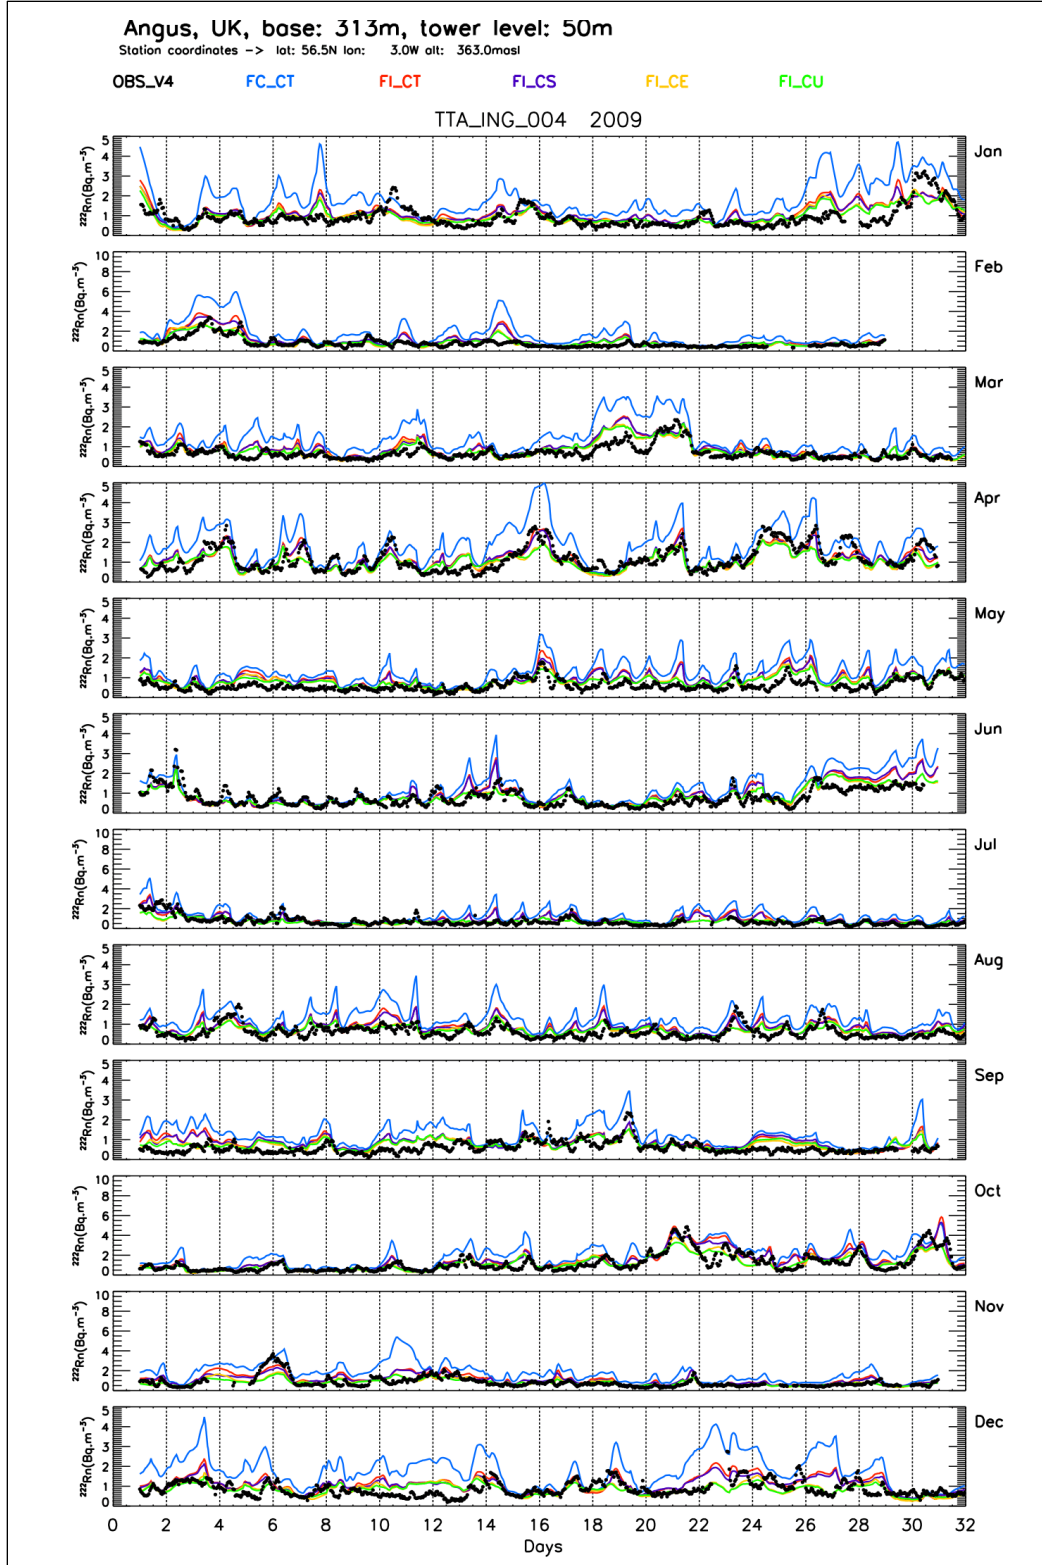

Figure S15: As Figure S14, but at Angus (TTA)

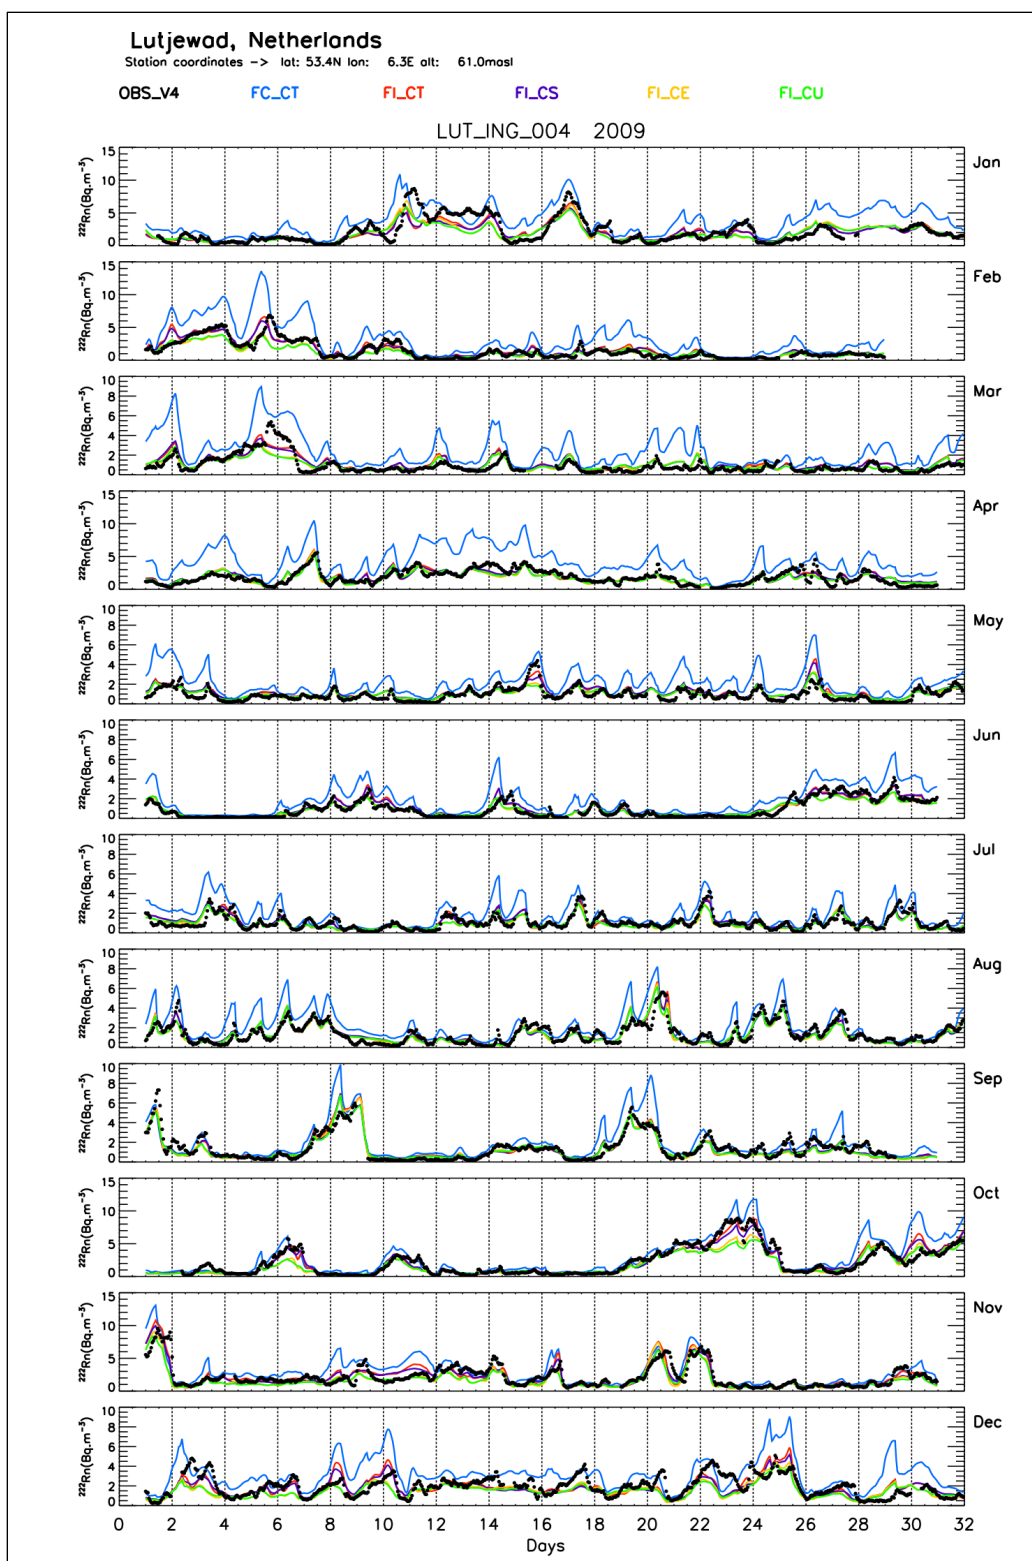

**Figure S16:** As Figure S14, but at Lutjewad (LUT)

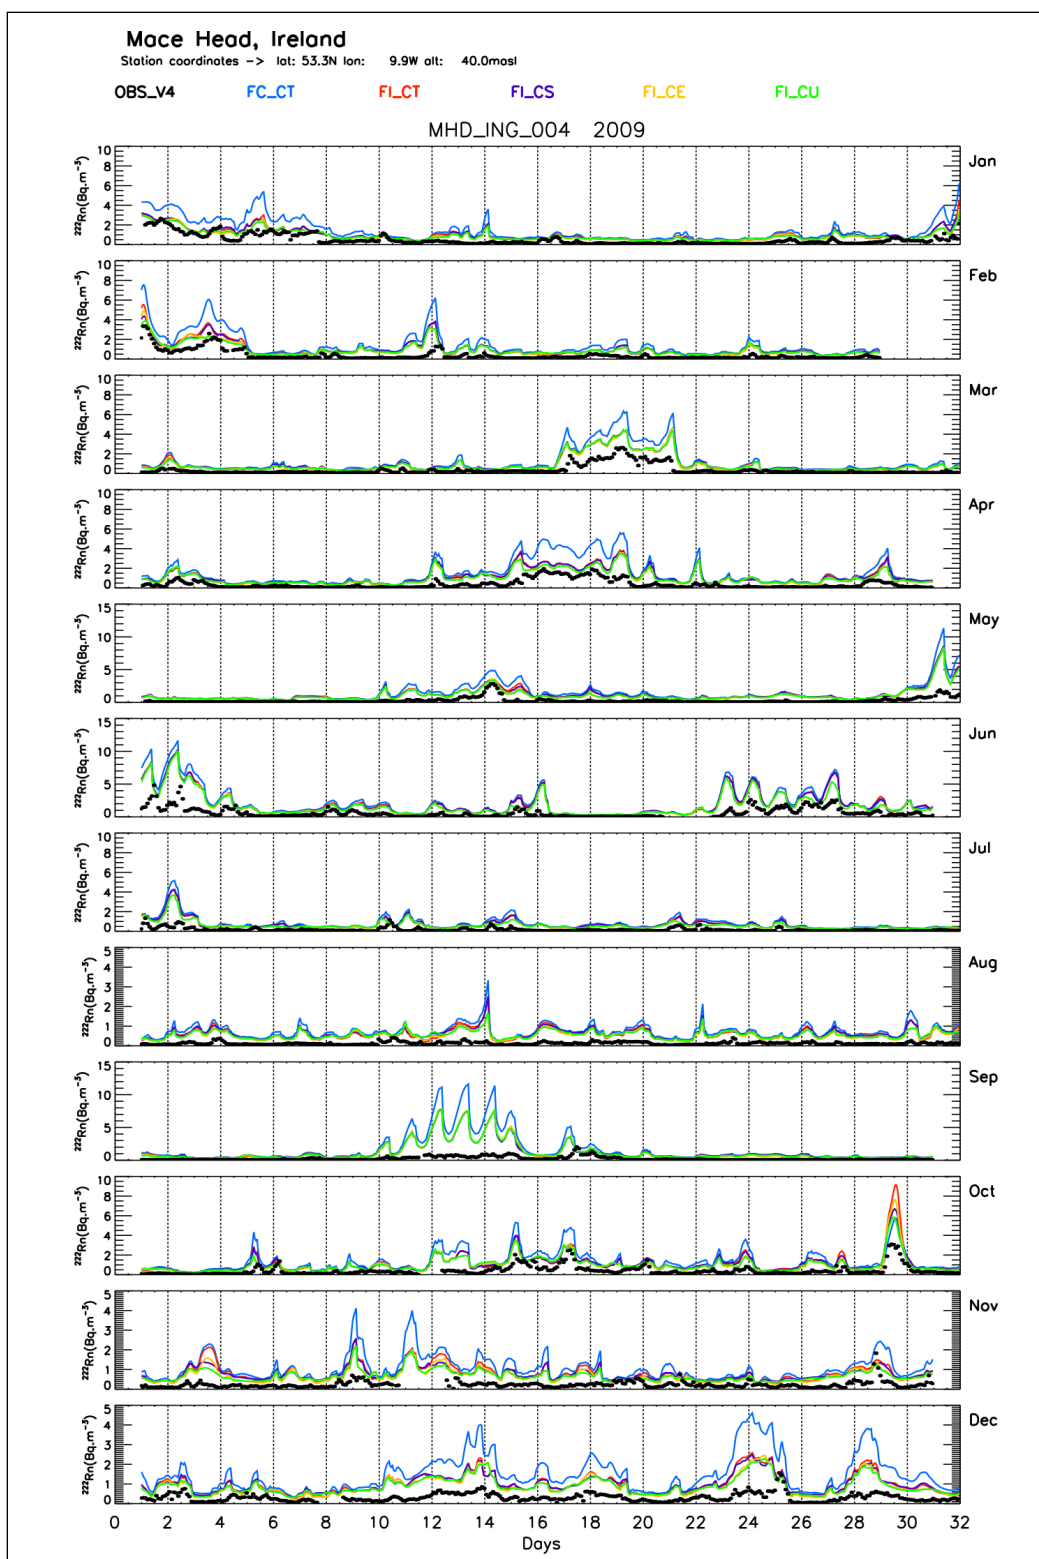

Figure S17: As Figure S14, but at Mace Head (MHD)

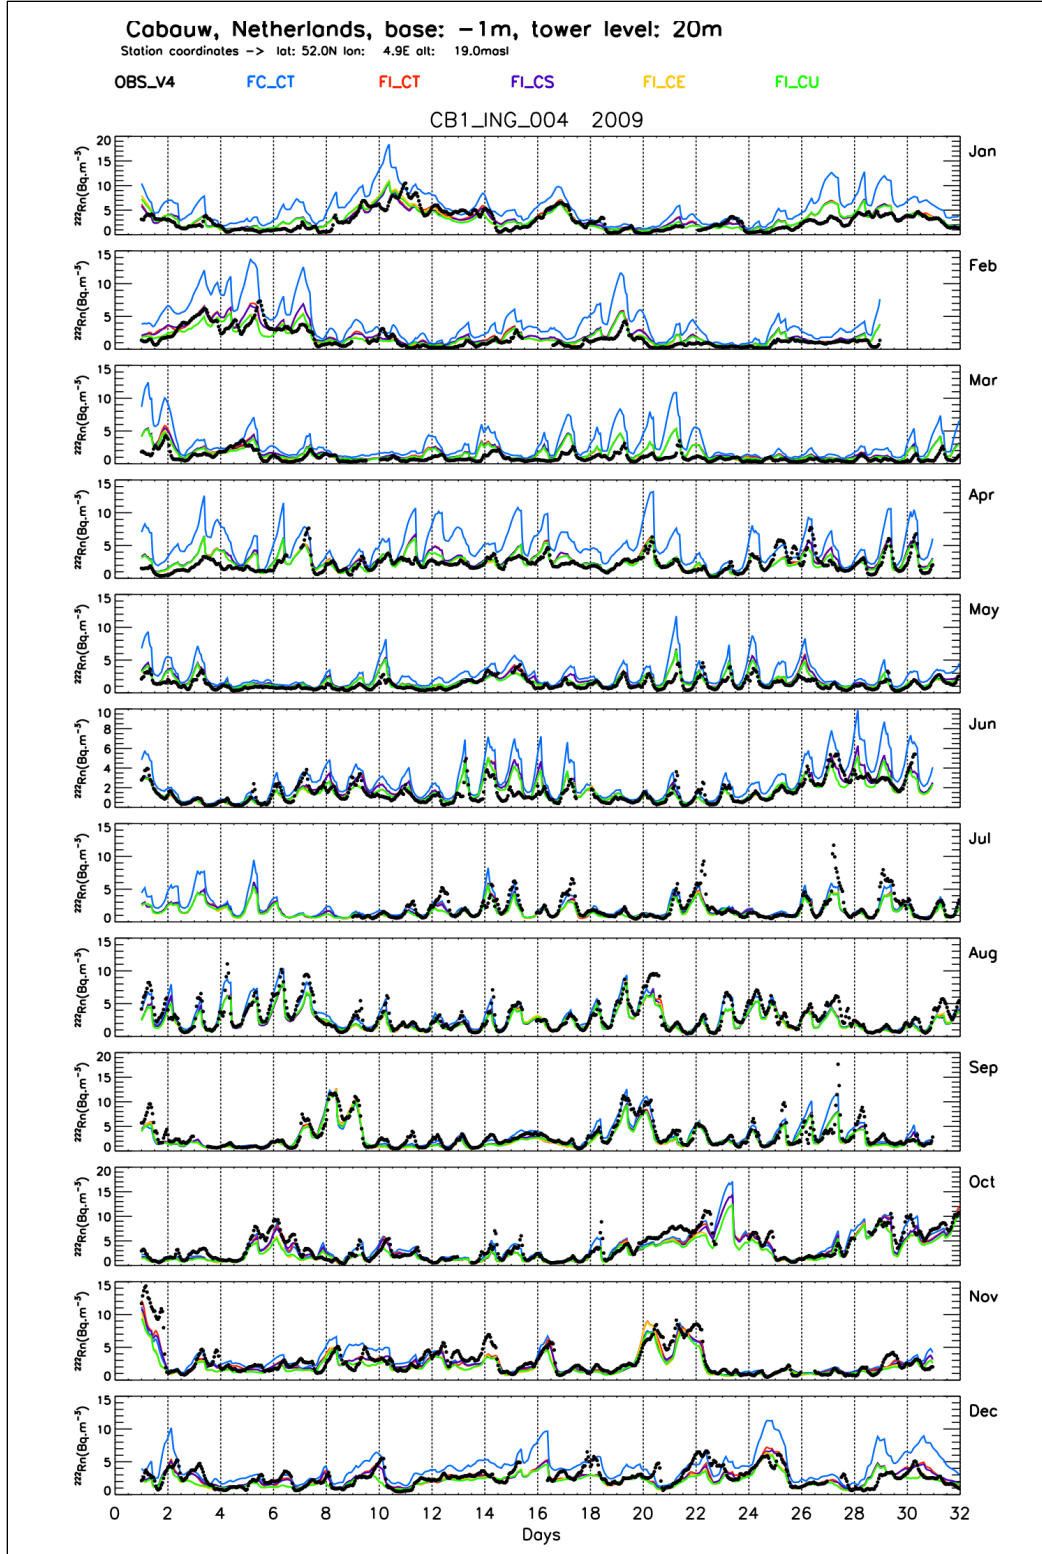

**Figure S18:** As Figure S14, but for Cabauw at 20 m [CB1]

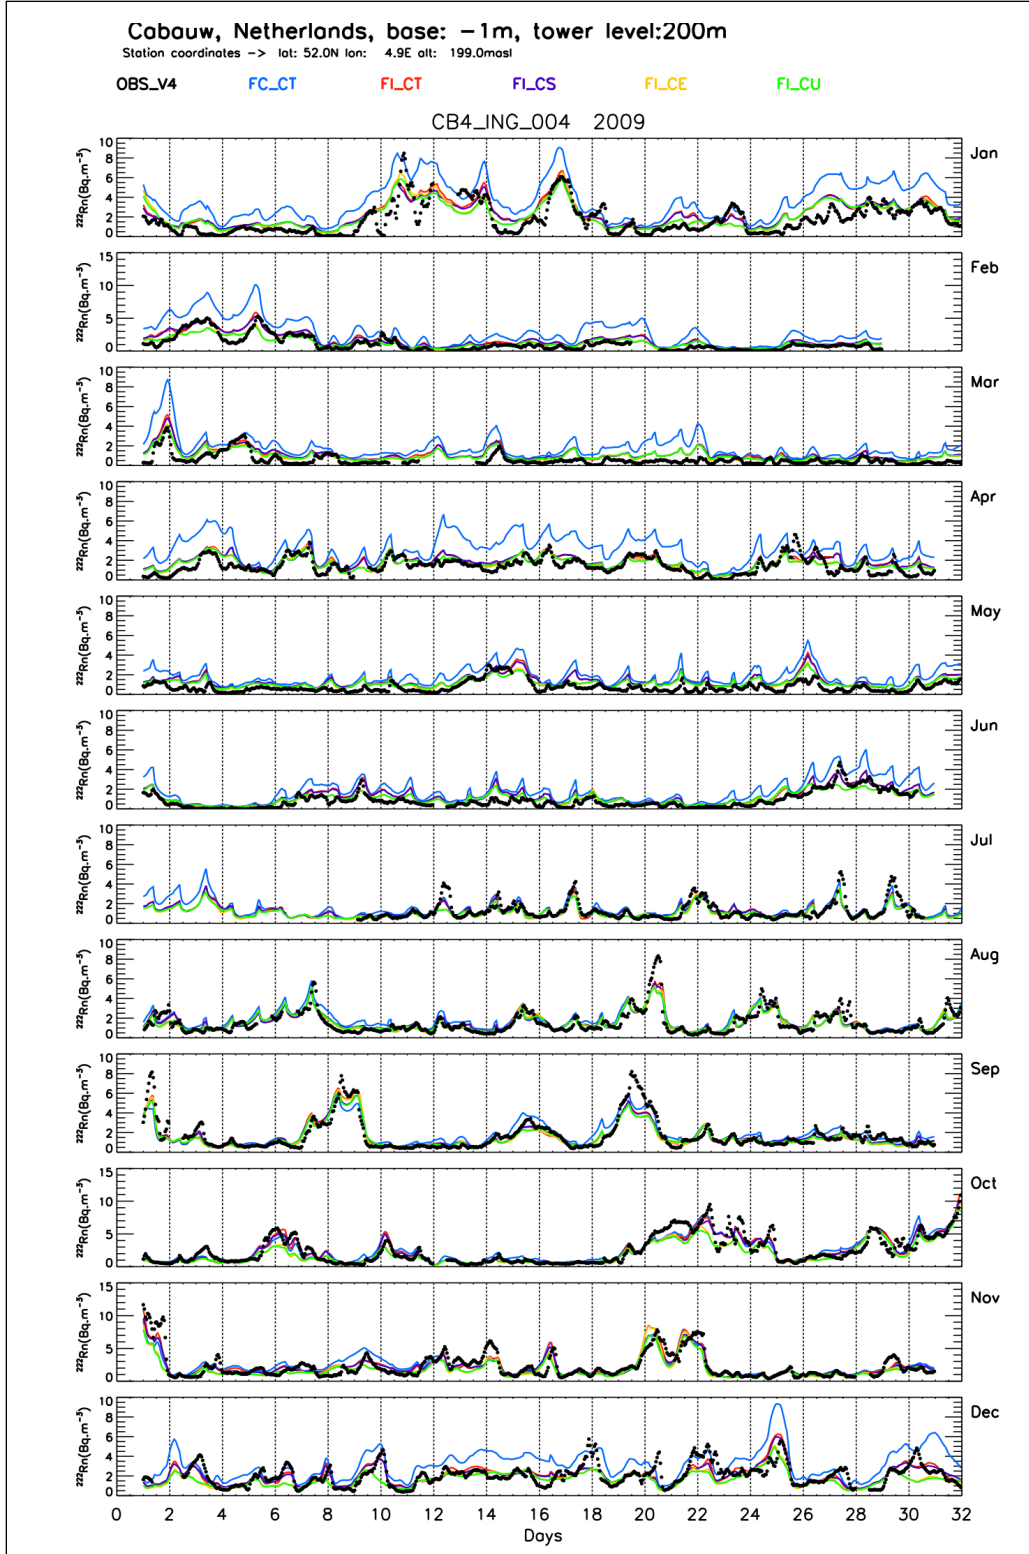

**Figure S19:** As Figure S14, but for Cabauw at 200 m height [CB4]

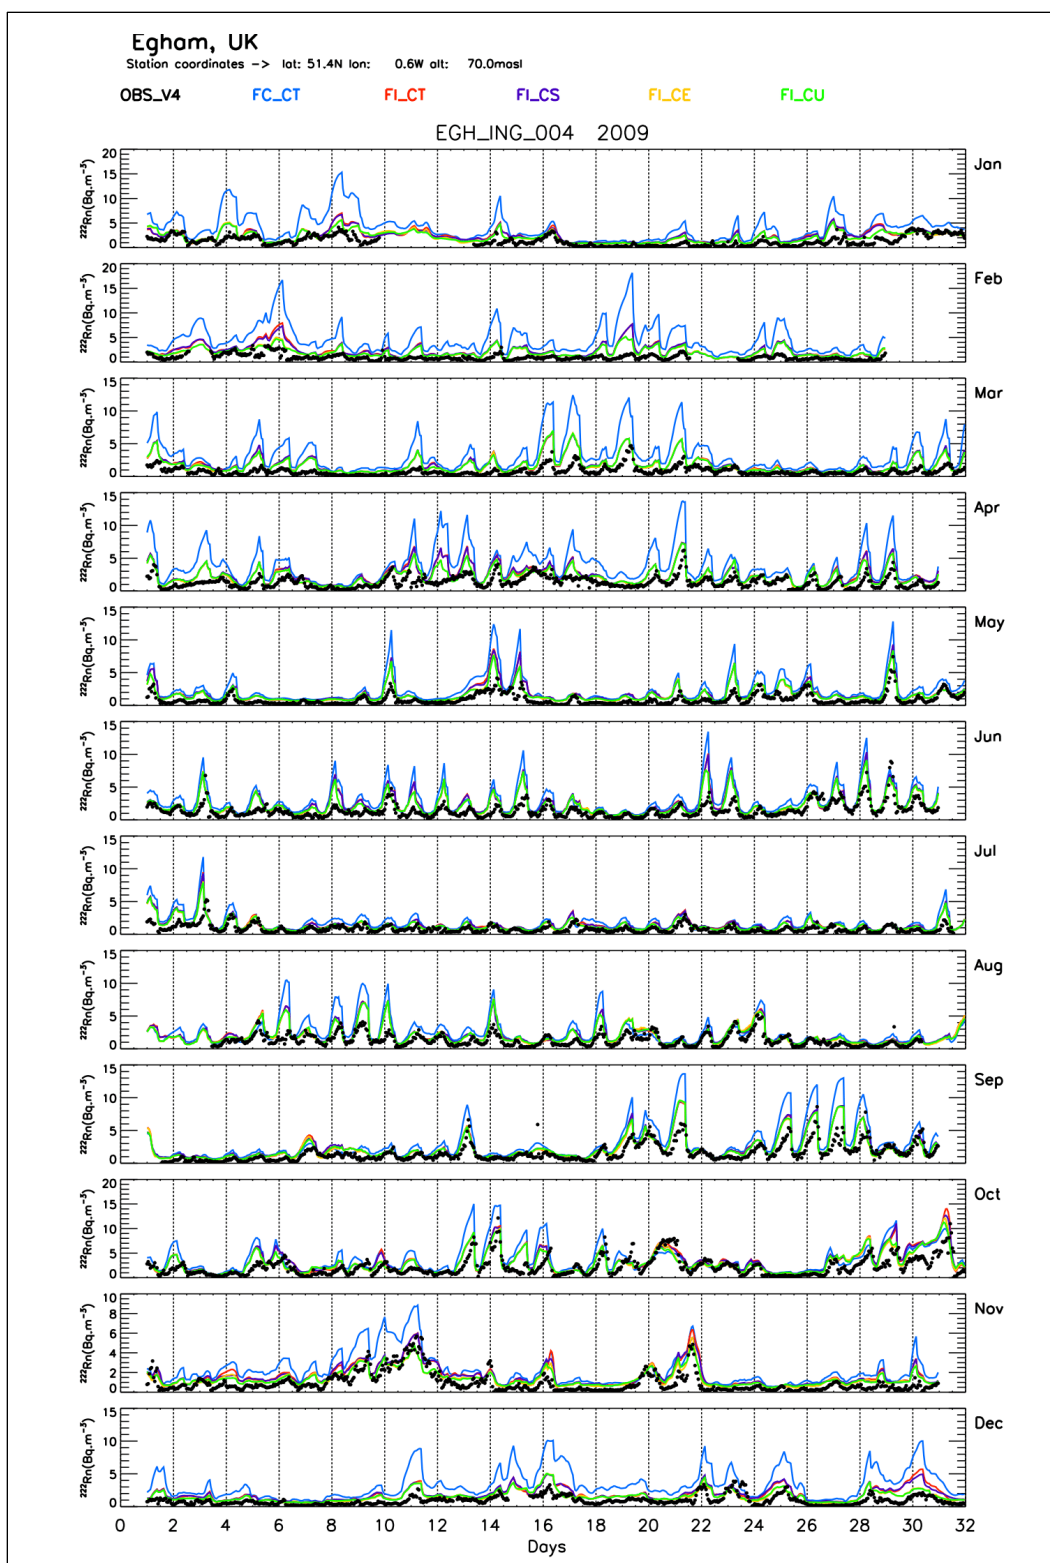

**Figure S20:** As Figure S14, but at Egham (EGH)

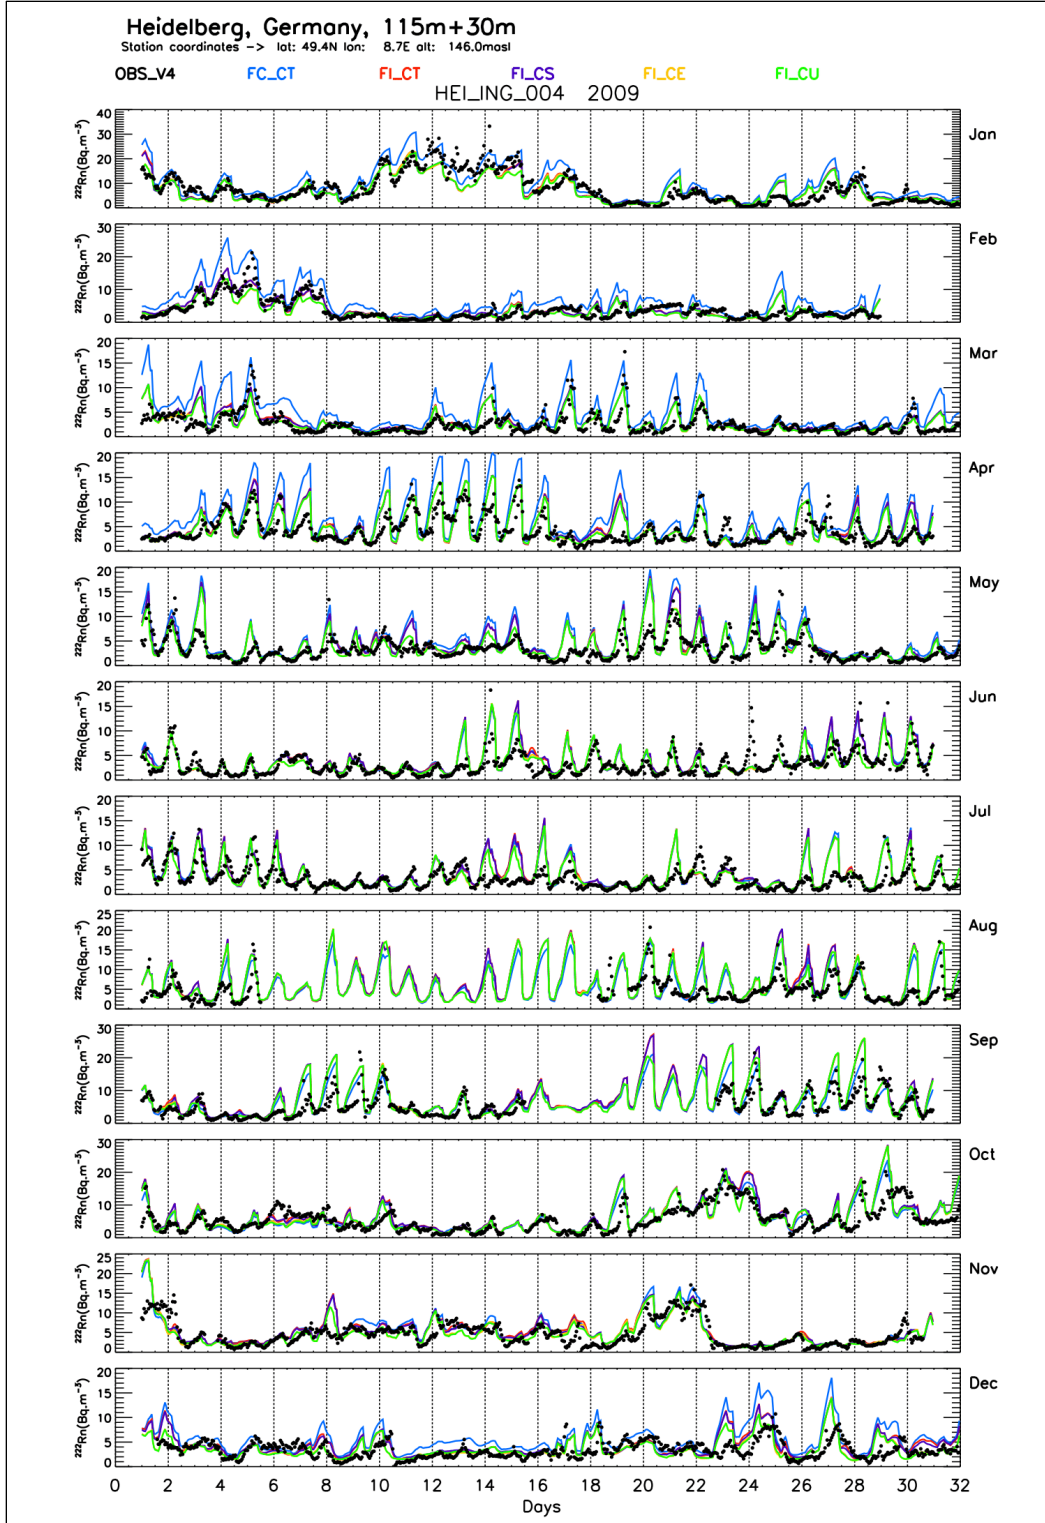

**Figure S21:** As Figure S14, but at Heidelberg (HEI)

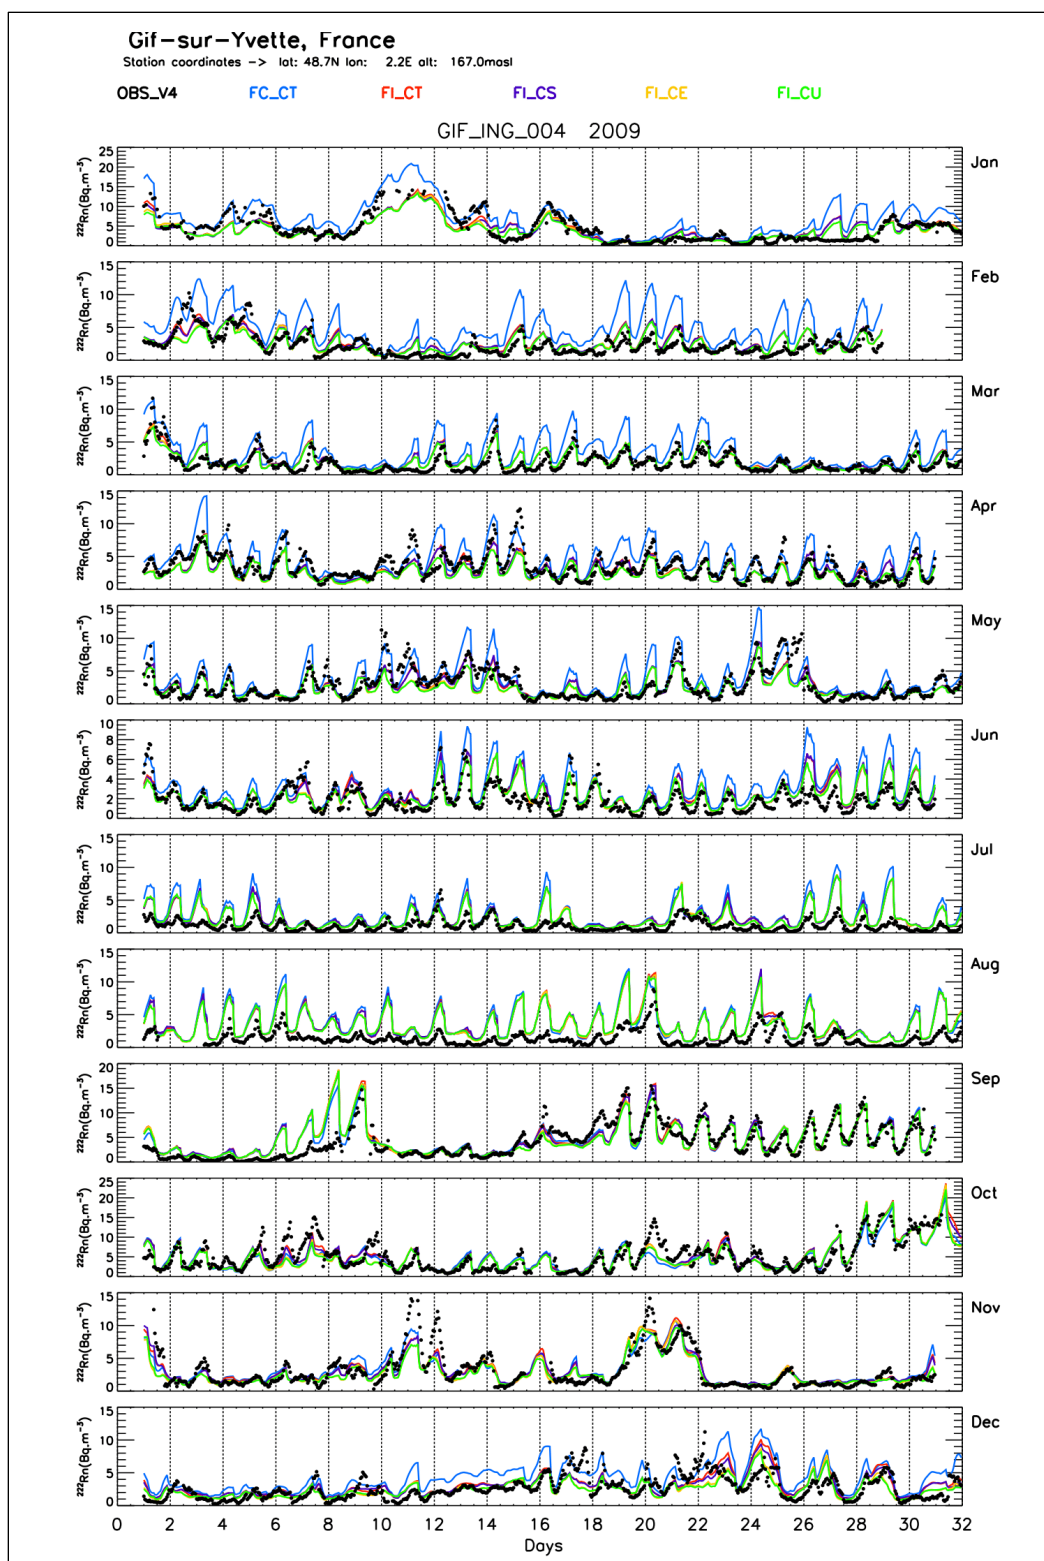

**Figure S22:** As Figure S14, but at Gif sur Yvette (GIF)

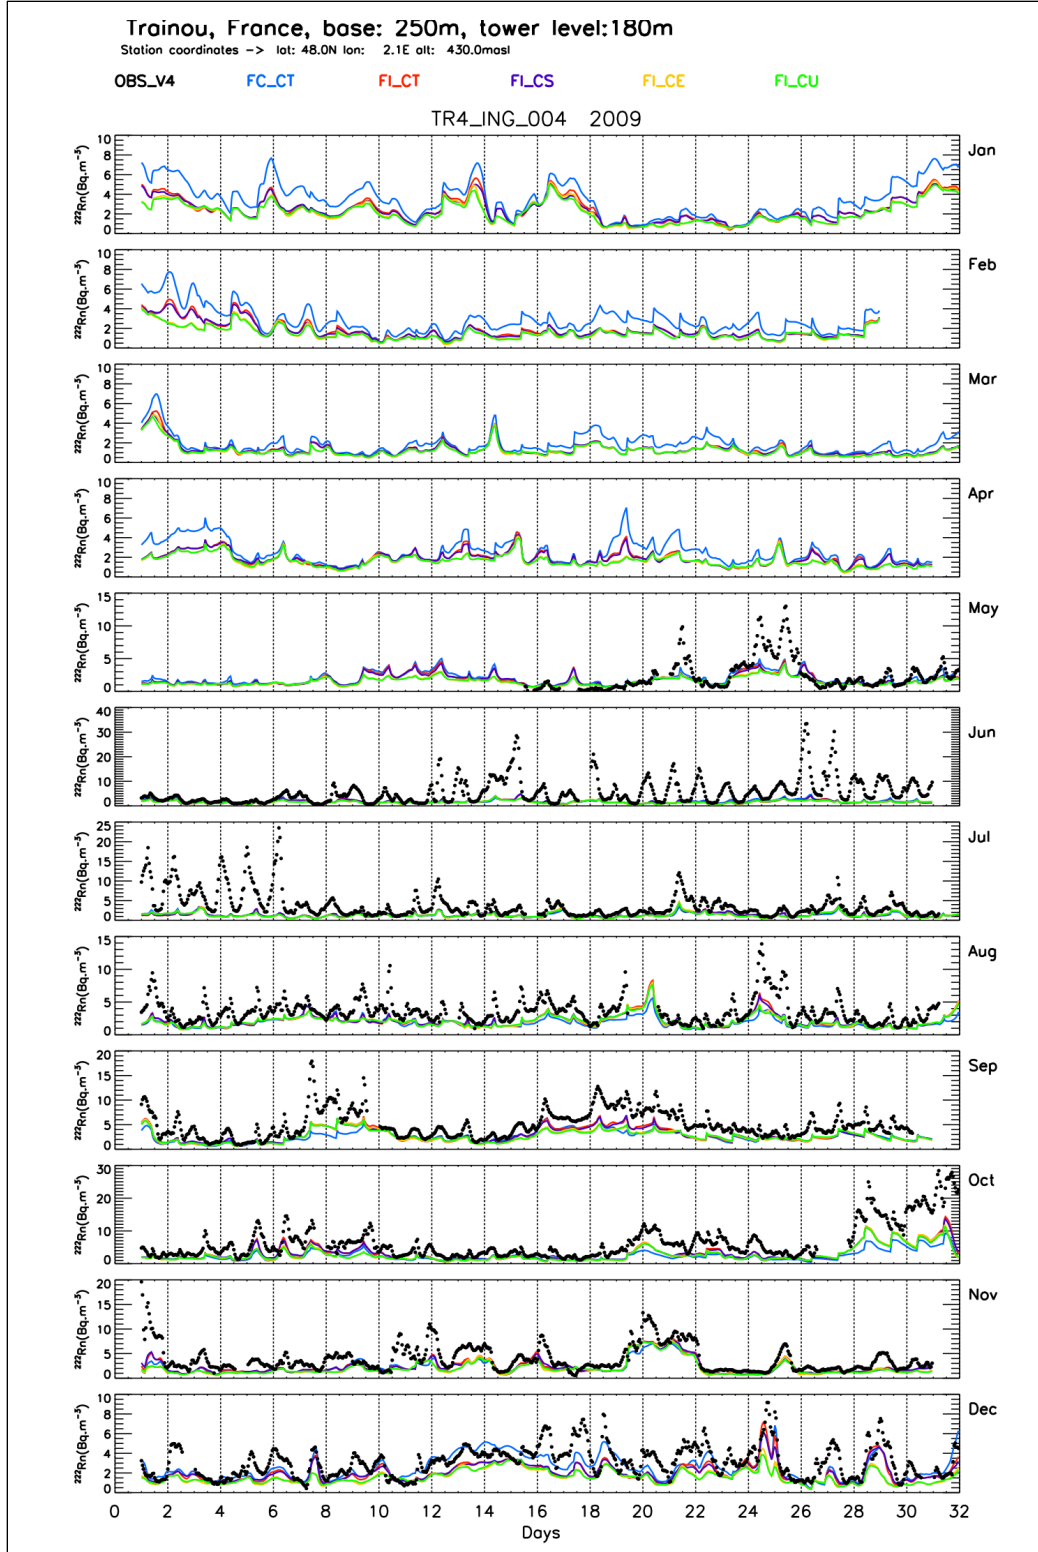

Figure S23: As Figure S14, but for Trainou at 180 m [TR4]

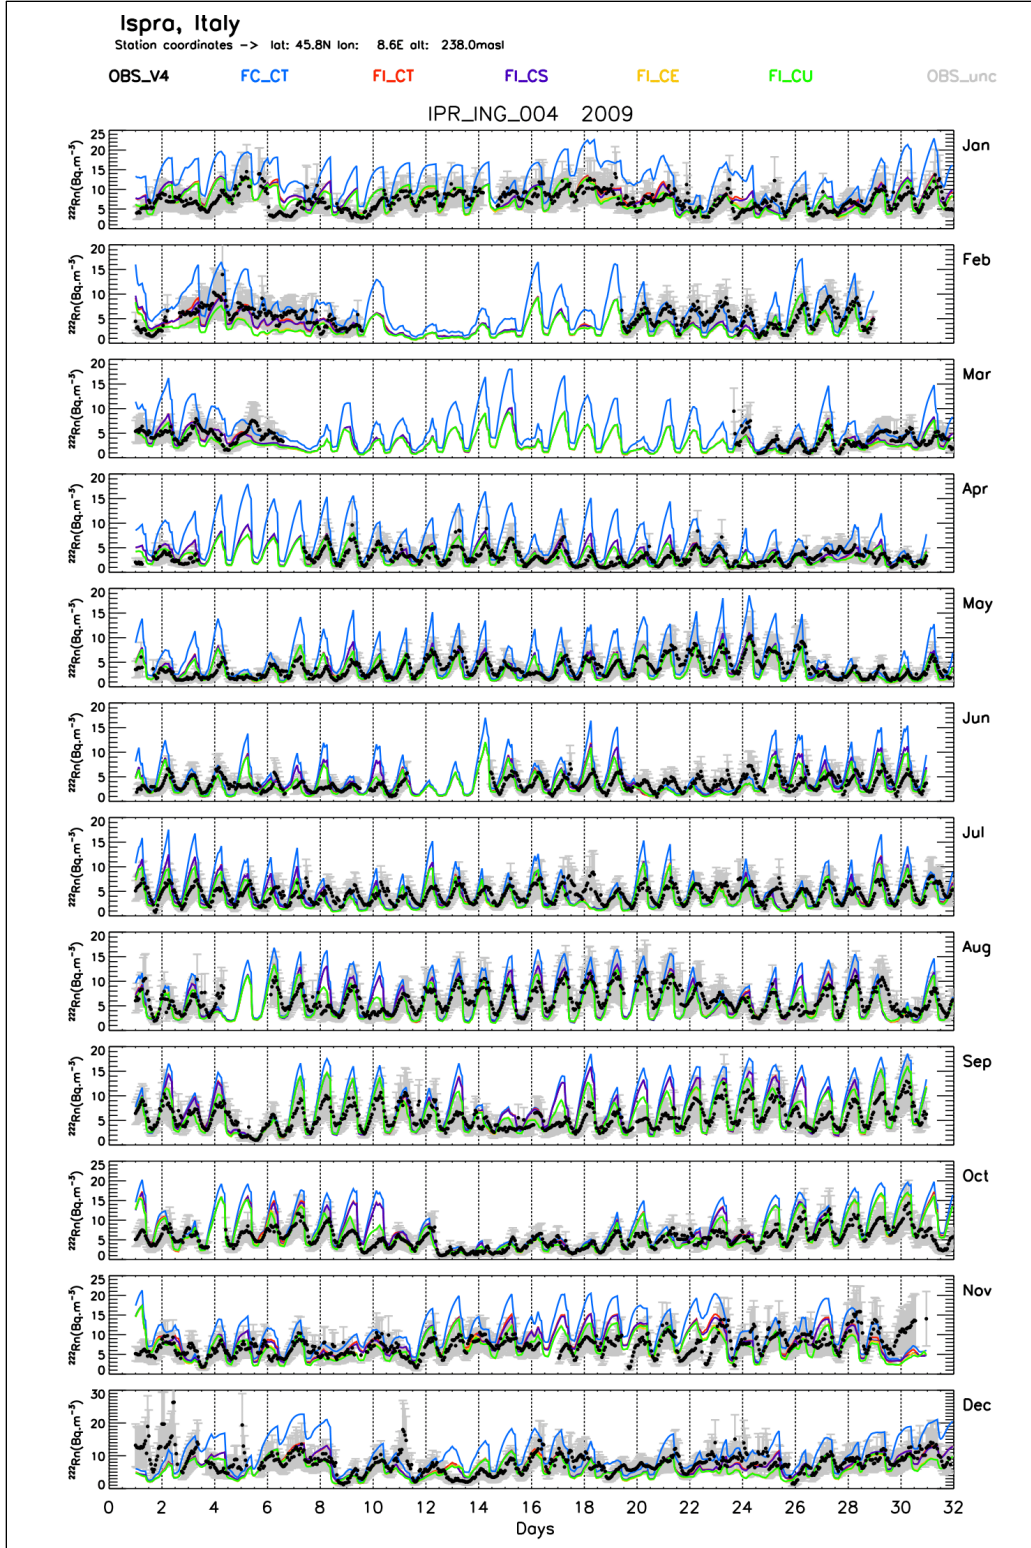

**Figure S24:** As Figure S14, but at Ispra (IPR). This figure includes also the uncertainties in the  $^{222}\text{Rn}$  activity concentrations (grey shaded area) from the wind-speed dependent correction of the measurements ('normalization' to 15m inlet height; see section 2.2).
